# Supplementary material
Source: PubMed Central journal article supplement (PMC7733815)
Supplement: pnas.2014058117.sapp.pdf [file pnas.2014058117.sapp.pdf]

## Supporting Information Appendix

### **Design of a Multivalent Bifunctional Chelator for Diagnostic $^{64}\text{Cu}$ PET Imaging in Alzheimer's Disease**

Hong-Jun Cho,<sup>1</sup> Truc T. Huynh,<sup>2,3</sup> Buck E. Rogers,<sup>2,\*</sup> and Liviu M. Mirica<sup>1,4,\*</sup>

<sup>1</sup> Department of Chemistry, University of Illinois at Urbana-Champaign, 600 S. Mathews Avenue, Urbana, Illinois 61801, United States

<sup>2</sup> Department of Radiation Oncology, Washington University School of Medicine, St. Louis, Missouri 63108, United States

<sup>3</sup> Department of Chemistry, Washington University, St. Louis, Missouri 63130, United States

<sup>4</sup> Hope Center for Neurological Disorders, Washington University School of Medicine, St. Louis, MO 63110, United States

\* e-mail: [mirica@illinois.edu](mailto:mirica@illinois.edu), [b.rogers@wustl.edu](mailto:b.rogers@wustl.edu)

#### **Table of Contents**

|     |                                                                          |     |
|-----|--------------------------------------------------------------------------|-----|
| 1.  | General methods                                                          | S2  |
| 2.  | Synthesis details                                                        | S3  |
| 3.  | Cell viability studies                                                   | S7  |
| 4.  | Radio-HPLC profiles                                                      | S8  |
| 5.  | Optical properties                                                       | S10 |
| 6.  | Fluorescence microscopy images                                           | S11 |
| 7.  | Autoradiography images                                                   | S13 |
| 8.  | Cell viability results                                                   | S14 |
| 9.  | Biodistribution results                                                  | S15 |
| 10. | PET/CT images                                                            | S17 |
| 11. | Post-PET biodistribution results                                         | S18 |
| 13. | Post-PET autoradiography results                                         | S19 |
| 14. | $^1\text{H}$ -NMR, $^{13}\text{C}$ -NMR, mass spectra, and HPLC profiles | S20 |
| 15. | References                                                               | S45 |

## General methods

Unless otherwise noted, all chemical reagents and solvents were purchased from commercial suppliers and used without further purification. The analysis and purification of the compounds were carried out on an Agilent Technologies 1260 Infinity II HPLC system (Santa Clara, CA, USA) equipped with UV-VIS and fluorescence detector using InfinityLab Poroshell 120 EC-C18 columns ( $4.6 \times 100$  mm and  $9.4 \times 150$  mm,  $4 \mu\text{m}$ ). Mass spectra were acquired on a high-resolution electrospray ionization mass spectrometry (HR-ESI-MS, Thermo Scientific™ LTQ Orbitrap XL™ Hybrid Ion Trap-Orbitrap) (Thermo Scientific, San Jose, CA, USA). UV-vis absorption and fluorescence emission spectra were measured by a SpectraMax M2e plate reader (Molecular Devices, Sunnyvale, CA, USA). The  $^1\text{H}$  and  $^{13}\text{C}$  nuclear magnetic resonance spectroscopy (NMR) spectra were recorded on a Varian VXR 500 (500 MHz and 126 MHz, respectively) using  $\text{CDCl}_3$  as a solvent and TMS as an internal standard. The Neuro-2a (N2A) mouse neuroblastoma cell line was purchased from the American Type Culture Collection (ATCC) and cultivated in Dulbecco's Modified Eagle Medium (DMEM) supplemented with 10% FBS and 1% antibiotic (penicillin-streptomycin) in a humidified 5%  $\text{CO}_2$  incubator at  $37^\circ\text{C}$ . 5xFAD transgenic mice overexpressing mutant human APP (695) with the Swedish (K670N, M671L), Florida (I716V), and London (V717I) were purchased from Jackson Laboratories (Bar Harbor, ME, USA), and wild type (WT) mice were purchased from Jackson Laboratories (B6SJLF1/J) and Charles River Laboratories (CD-1). Monoclonal anti-A $\beta$ -antibody (HJ3.4) was obtained from Dr. David Holtzman, Department of Neurology at Washington University School of Medicine. The antibody was directly labeled with CF™ 594 dye using Mix-n-Stain™ CF™ 594 Antibody Labeling Kit purchased from Millipore Sigma (St. Louis, MO, USA), in accordance with the protocol provided by the manufacturer. Fluorescence images for brain sections were visualized using an Invitrogen EVOS FL Auto 2 Imaging System (ThermoFisher, USA). Colocalization analysis and determination of the Pearson's correlation coefficient was performed with the imaging software Fiji (ImageJ 1.52p). Radioactivity was counted with a Beckman Gamma 8000 counter containing a NaI crystal (Beckman Instruments, Inc., Irvine, CA, USA). High-performance liquid chromatography (HPLC) analysis was performed using Kinetex (Phenomenex) C-18 column ( $4.6$  mm  $\times$   $150$  mm,  $5 \mu\text{m}$ ) in Agilent Technologies 1200 series HPLC equipped with a NaI radiotracer detector and a photodiode array detector. Positron emission tomography/computed tomography (PET/CT) images were taken on an Inveon small animal PET/CT scanner (Siemens Medical Solutions, Knoxville, TN, USA). Dynamic images were collected and reconstructed with the Maximum A posteriori Probability (MAP) algorithm followed by CT co-registration with the Inveon Research Workstation image display software (Siemens Medical Solutions, Knoxville, TN, USA).

## Synthesis details

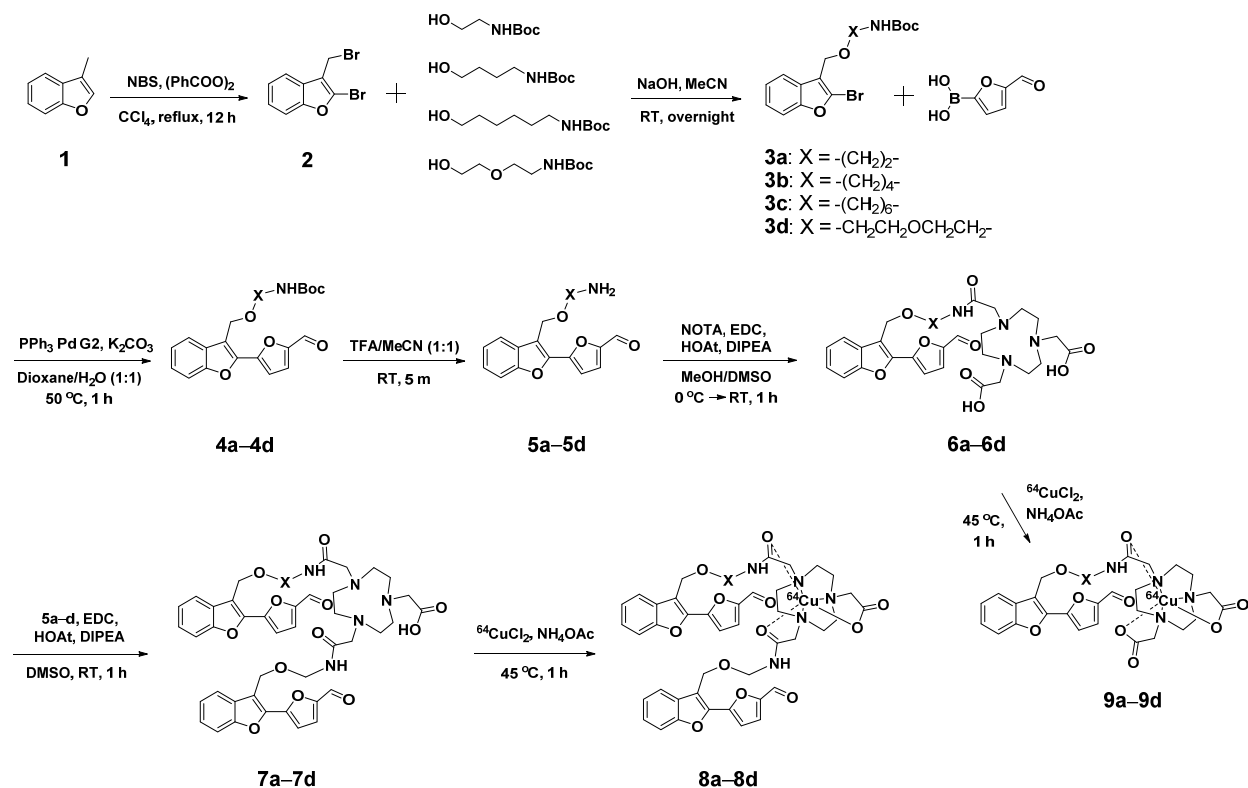

**Scheme S1.** Synthetic route for the multivalent  $^{64}\text{Cu}$ -labeled complexes (**8a-8d** and **9a-9d**)

### Compound 2 (2-bromo-3-bromomethylbenzofuran)

Compound **2** was synthesized according to a modified procedure previously described. (1) *N*-Bromosuccinimide (NBS, 10 g, 56.19 mmol) and benzoyl peroxide (68 mg, 0.28 mmol) were added to a solution of 3-methylbenzofuran (3.71 g, 28.09 mmol) in carbon tetrachloride (80 mL) under nitrogen atmosphere. The reaction mixture was heated under reflux and monitored by GC-MS. After 4 h, NBS (1 g, 5.62 mmol) was added into the reaction mixture followed by reflux for 2 h. If mono-brominated contents were still over 20%, additional 1 g of NBS was added and the reaction mixture was heated under reflux for 2 h. After cooling to room temperature, the solvent was evaporated and the residue diluted with diethyl ether. The organic solution was washed with brine. The organic layer was dried over  $\text{MgSO}_4$  and concentrated. The residue was purified by column chromatography on silica gel (eluent: hexane and ethyl acetate, > 100:1) and crystallized in hexane. The compound **2** was obtained in 64% yield (5.23 g) as white crystals.  $^1\text{H NMR}$  (500 MHz,  $\text{CDCl}_3$ ):  $\delta$  = 7.66–7.60 (m, 1H), 7.48–7.43 (m, 1H), 7.34–7.29 (m, 2H), 4.56 (s, 2H);  $^{13}\text{C NMR}$  (126 MHz,  $\text{CDCl}_3$ ):  $\delta$  = 155.60, 129.04, 126.98, 125.20, 123.81, 119.30, 116.98, 111.36, 22.08; MS (*m/z*, %): 292 ( $\text{M}^{++4}$ , 6), 290 ( $\text{M}^{++2}$ , 13), 288 ( $\text{M}^+$ , 6), 212 (10), 211 (97), 210 (11), 209 (100), 105 (8), 104 (9), 103 (7), 102 (76), 101 (23), 76 (15), 75 (19), 74 (12), 63 (8), 51 (17), 50 (11).

### Compounds **3a–3d**

*N*-Boc-ethanolamine (467 mg, 2.90 mmol), 4-(*boc*-amino)-1-butanol (548 mg, 2.90 mmol), 6-(*boc*-amino)-1-hexanol (630 mg, 2.90 mmol), or 2-[2-(*boc*-amino)ethoxy]ethanol (595 mg, 2.90 mmol) was added to the solution of compound **2** (420 mg, 1.45 mmol) in MeCN (2 mL). After adding NaOH (232 mg, 5.79 mmol) into the solution, the reaction mixture was stirred vigorously overnight at room temperature. The reaction mixture was filtered, and the filtrate diluted with ethyl acetate. The organic solution was washed with saturated NaHCO<sub>3</sub> solution and brine. The organic layer was dried over MgSO<sub>4</sub> and concentrated. The residue was purified by column chromatography on silica gel (eluent: hexane and ethyl acetate, 5:1). The compounds (**3a–3d**) were obtained in 85–91 % yields as colorless (or light yellow) oils (**3a** (91%, 487 mg); **3b** (90%, 520 mg); **3c** (85%, 527 mg); **3d** (90%, 541 mg)).

**3a**: <sup>1</sup>H NMR (500 MHz, CDCl<sub>3</sub>): δ = 7.64–7.59 (m, 1H), 7.47–7.41 (m, 1H), 7.32–7.23 (m, 2H), 4.84 (s, 1H), 4.62 (s, 2H), 3.54 (t, *J* = 5.0 Hz, 2H), 3.34–3.30 (m, 2H), 1.42 (s, 9H); <sup>13</sup>C NMR (126 MHz, CDCl<sub>3</sub>): δ = 156.04, 155.59, 128.70, 128.03, 124.80, 123.67, 119.51, 116.43, 111.16, 79.39, 69.19, 63.64, 40.55, 28.51; HRMS: calculated exact mass = 370.0653 for C<sub>16</sub>H<sub>21</sub>BrNO<sub>4</sub> [M+H]<sup>+</sup>, found 370.0661.

**3b**: <sup>1</sup>H NMR (500 MHz, CDCl<sub>3</sub>): δ = 7.65–7.60 (m, 1H), 7.46–7.41 (m, 1H), 7.31–7.22 (m, 2H), 4.59 (s, 2H), 4.55 (s, 1H), 3.49 (t, *J* = 6.2 Hz, 2H), 3.14–3.08 (m, 2H), 1.66–1.58 (m, 2H), 1.58–1.50 (m, 2H), 1.43 (s, 9H); <sup>13</sup>C NMR (126 MHz, CDCl<sub>3</sub>): δ = 156.11, 155.59, 128.45, 128.17, 124.71, 123.58, 119.69, 116.77, 111.08, 79.19, 69.89, 63.51, 40.48, 28.57, 27.09, 27.00; HRMS: calculated exact mass = 398.0967 for C<sub>18</sub>H<sub>25</sub>BrNO<sub>4</sub> [M+H]<sup>+</sup>, found 398.0966.

**3c**: <sup>1</sup>H NMR (500 MHz, CDCl<sub>3</sub>): δ = 7.66–7.61 (m, 1H), 7.46–7.41 (m, 1H), 7.31–7.23 (m, 2H), 4.59 (s, 2H), 4.47 (s, 1H), 3.46 (t, *J* = 6.5 Hz, 2H), 3.11–3.03 (m, 2H), 1.59 (quint., *J* = 6.6 Hz, 2H), 1.49–1.39 (m, 2H), 1.44 (s, 9H), 1.39–1.24 (m, 4H); <sup>13</sup>C NMR (126 MHz, CDCl<sub>3</sub>): δ = 156.12, 155.59, 128.38, 128.23, 124.67, 123.53, 119.77, 116.89, 111.05, 79.17, 70.22, 63.48, 40.66, 30.15, 29.70, 28.58, 26.71, 25.99; HRMS: calculated exact mass = 426.1280 for C<sub>20</sub>H<sub>29</sub>BrNO<sub>4</sub> [M+H]<sup>+</sup>, found 426.1280.

**3d**: <sup>1</sup>H NMR (500 MHz, CDCl<sub>3</sub>): δ = 7.70–7.63 (m, 1H), 7.47–7.39 (m, 1H), 7.32–7.22 (m, 2H), 4.95 (s, 1H), 4.68 (s, 2H), 3.61 (s, 4H), 3.52 (t, *J* = 5.1 Hz, 2H), 3.33–3.28 (m, 2H), 1.44 (s, 9H); <sup>13</sup>C NMR (126 MHz, CDCl<sub>3</sub>): δ = 156.10, 155.59, 128.62, 128.10, 124.77, 123.60, 119.77, 116.49, 111.08, 79.35, 70.42, 69.15, 63.84, 40.54, 28.56; HRMS: calculated exact mass = 414.0916 for C<sub>18</sub>H<sub>25</sub>BrNO<sub>5</sub> [M+H]<sup>+</sup>, found 414.0904.

### Compounds **4a–4d**

Compound **3a** (77 mg, 208 μmol), compound **3b** (83 mg, 208 μmol), compound **3c** (89 mg, 208 μmol), or compound **3d** (86 mg, 208 μmol) was dissolved in dioxane (4 mL). 5-Formyl-2-

furanylboronic acid (35 mg, 250  $\mu\text{mol}$ ),  $\text{K}_2\text{CO}_3$  (58 mg, 417  $\mu\text{mol}$ ), and  $\text{PPh}_3$  Pd G2 (chloro(triphenylphosphine) [2-(2'-amino-1,1'-biphenyl)]palladium(II), 6 mg, 10  $\mu\text{mol}$ ) dissolved in water (4 mL) were added to the compound solutions. The mixtures were stirred at 50  $^\circ\text{C}$  for 2 h. The reaction mixture was filtered, and the filtrate diluted with diethyl ether, and the organic solution was washed with water 3 times. The organic layer was dried over  $\text{MgSO}_4$  and concentrated under reduced pressure. The crude product was purified by column chromatography on silica (eluent: hexane and ethyl acetate, 4:1). The compounds (**4a–4d**) were obtained in 60–92 % yields as brown powders (**4a** (92%, 74 mg); **4b** (83%, 71 mg); **4c** (60%, 55 mg); **4d** (89%, 80 mg)).

**4a**:  $^1\text{H}$  NMR (500 MHz,  $\text{CDCl}_3$ ):  $\delta$  = 9.73 (s, 1H), 7.78 (d,  $J$  = 7.7 Hz, 1H), 7.53 (d,  $J$  = 8.2 Hz, 1H), 7.45–7.30 (m, 3H), 7.04 (d,  $J$  = 3.7 Hz, 1H), 5.07 (s, 2H), 4.92 (s, 1H), 3.67 (t,  $J$  = 5.1 Hz, 2H), 3.41–3.34 (m, 2H), 1.43 (s, 9H);  $^{13}\text{C}$  NMR (126 MHz,  $\text{CDCl}_3$ ):  $\delta$  = 177.21, 156.08, 154.91, 152.78, 151.14, 143.24, 128.73, 126.47, 123.84, 122.65, 121.16, 116.93, 111.57, 111.24, 79.35, 69.60, 62.92, 40.63, 28.51; HRMS: calculated exact mass = 386.1604 for  $\text{C}_{21}\text{H}_{24}\text{NO}_6$   $[\text{M}+\text{H}]^+$ , found 386.1609.

**4b**:  $^1\text{H}$  NMR (500 MHz,  $\text{CDCl}_3$ ):  $\delta$  = 9.71 (s, 1H), 7.77 (d,  $J$  = 7.2 Hz, 1H), 7.50 (d,  $J$  = 8.2 Hz, 1H), 7.41–7.27 (m, 3H), 7.01 (d,  $J$  = 3.8 Hz, 1H), 5.01 (s, 2H), 4.60 (s, 1H), 3.60 (t,  $J$  = 6.2 Hz, 2H), 3.17–3.04 (m, 2H), 1.72–1.61 (m, 2H), 1.61–1.50 (m, 2H), 1.42 (s, 9H);  $^{13}\text{C}$  NMR (126 MHz,  $\text{CDCl}_3$ ):  $\delta$  = 177.21, 156.14, 154.92, 152.73, 151.27, 143.00, 128.84, 126.39, 123.73, 122.71, 121.36, 117.44, 111.49, 111.18, 79.15, 70.34, 62.80, 40.49, 28.56, 27.14, 26.99; HRMS: calculated exact mass = 414.1917 for  $\text{C}_{23}\text{H}_{28}\text{NO}_6$   $[\text{M}+\text{H}]^+$ , found 414.1920.

**4c**:  $^1\text{H}$  NMR (500 MHz,  $\text{CDCl}_3$ ):  $\delta$  = 9.73 (s, 1H), 7.80 (d,  $J$  = 7.8 Hz, 1H), 7.52 (d,  $J$  = 8.2 Hz, 1H), 7.43–7.29 (m, 3H), 7.03 (d,  $J$  = 3.7 Hz, 1H), 5.03 (s, 2H), 4.52 (s, 1H), 3.59 (t,  $J$  = 6.5 Hz, 2H), 3.14–3.03 (m, 2H), 1.65 (quint.,  $J$  = 6.6 Hz, 2H), 1.50–1.42 (m, 2H), 1.45 (s, 9H), 1.42–1.28 (m, 4H);  $^{13}\text{C}$  NMR (126 MHz,  $\text{CDCl}_3$ ):  $\delta$  = 177.23, 156.11, 154.91, 152.71, 151.29, 142.94, 128.88, 126.36, 123.68, 122.63, 121.44, 117.61, 111.47, 111.18, 79.14, 70.68, 62.82, 40.66, 30.13, 29.76, 28.57, 26.72, 26.01; HRMS: calculated exact mass = 442.2230 for  $\text{C}_{25}\text{H}_{32}\text{NO}_6$   $[\text{M}+\text{H}]^+$ , found 442.2240.

**4d**:  $^1\text{H}$  NMR (500 MHz,  $\text{CDCl}_3$ ):  $\delta$  = 9.71 (s, 1H), 7.81 (d,  $J$  = 7.8 Hz, 1H), 7.50 (d,  $J$  = 8.2 Hz, 1H), 7.41–7.28 (m, 3H), 7.04 (d,  $J$  = 3.7 Hz, 1H), 5.10 (s, 2H), 4.97 (s, 1H), 3.77–3.71 (m, 2H), 3.68–3.62 (m, 2H), 3.53 (t,  $J$  = 5.0 Hz, 2H), 3.34–3.27 (m, 2H), 1.42 (s, 9H);  $^{13}\text{C}$  NMR (126 MHz,  $\text{CDCl}_3$ ):  $\delta$  = 177.17, 156.12, 154.93, 152.74, 151.20, 143.11, 128.79, 126.44, 123.76, 122.73, 121.48, 117.19, 111.49, 111.26, 79.33, 70.41, 69.65, 63.18, 40.57, 28.55; HRMS: calculated exact mass = 430.1866 for  $\text{C}_{23}\text{H}_{28}\text{NO}_7$   $[\text{M}+\text{H}]^+$ , found 430.1862.

### Compounds **6a–6d**

Compound **4a** (3.2 mg, 8  $\mu\text{mol}$ ), compound **4b** (3.4 mg, 8  $\mu\text{mol}$ ), compound **4c** (3.6 mg, 8  $\mu\text{mol}$ ), or compound **4d** (3.5 mg, 8  $\mu\text{mol}$ ) was dissolved in MeCN (0.5 mL). Trifluoroacetic acid (0.5 mL)

was added to the compound solutions. After completion of Boc deprotection confirmed by HPLC, the solvent was completely dried by nitrogen blowing for 10 min. The deprotected amine compounds (**5a–5d**) were dissolved in EtOH (1 mL) and treated with the preactivated 1,4,7-triazacyclononane-1,4,7-triacetic acid (NOTA) solution, which was prepared with NOTA (10.0 mg, 33  $\mu\text{mol}$ ), 1-ethyl-3-(3-dimethylaminopropyl)carbodiimide (EDC, 9.5 mg, 49  $\mu\text{mol}$ ), 1-hydroxy-7-azabenzotriazole (HOAt, 5.7 mg, 49  $\mu\text{mol}$ ), and *N,N*-diisopropylethylamine (DIPEA, 11.5  $\mu\text{L}$ , 66  $\mu\text{mol}$ ) in DMSO (1 mL). The mixtures were stirred at 0 °C for 1 h and then allowed to warm up to room temperature. After depletion of the boc-protected residues confirmed by HPLC, the mixture was stopped by adding several drops of TFA, and then purified with HPLC. For the compound analysis in HPLC, a flow rate of 1.0 mL/min and a linear gradient of 10–80% solvent B over 20 min, then a linear gradient of 80–100% solvent B over 5 min followed by a 5 min-constant flow of 100% solvent B (solvent A, 0.1% TFA in water; solvent B, 0.1% TFA in acetonitrile) were used with an InfinityLab Poroshell 120 EC-C18 column (4.6  $\times$  150 mm, 4  $\mu\text{m}$ , Agilent, USA). For the compound purification, a flow rate of 4.0 mL/min and a linear gradient of 20–80% solvent B over 20 min, then a linear gradient of 80–100% solvent B over 5 min followed by a 5 min-constant flow of 100% solvent B were used with a custom Poroshell 120 EC-C18 column (9.4  $\times$  150 mm, 4  $\mu\text{m}$ , Agilent, USA). Absorbance was measured at 230 and 260 nm, and fluorescence detection used excitation at 355 nm and emission at 460 nm. The lyophilized compounds (**6a–6d**) were obtained in 45–59 % yields from freeze drying of HPLC fraction containing the product (**6a** (53%, 2.5 mg); **6b** (45%, 2.2 mg); **6c** (45%, 2.3 mg); **6d** (59%, 3.0 mg)).

**6a**: HRMS: calculated exact mass = 571.2404 for  $\text{C}_{28}\text{H}_{35}\text{N}_4\text{O}_9$   $[\text{M}+\text{H}]^+$ , found 571.2430.

**6b**: HRMS: calculated exact mass = 599.2717 for  $\text{C}_{30}\text{H}_{39}\text{N}_4\text{O}_9$   $[\text{M}+\text{H}]^+$ , found 599.2725.

**6c**: HRMS: calculated exact mass = 627.3030 for  $\text{C}_{32}\text{H}_{43}\text{N}_4\text{O}_9$   $[\text{M}+\text{H}]^+$ , found 627.3036.

**6d**: HRMS: calculated exact mass = 615.2666 for  $\text{C}_{30}\text{H}_{39}\text{N}_4\text{O}_{10}$   $[\text{M}+\text{H}]^+$ , found 615.2678.

### Compounds **7a–7d**

Compound **6a** (1.7 mg, 3  $\mu\text{mol}$ ), compound **6b** (1.8 mg, 3  $\mu\text{mol}$ ), compound **6c** (1.9 mg, 3  $\mu\text{mol}$ ), or compound **6d** (1.8 mg, 3  $\mu\text{mol}$ ) was dissolved in DMSO (0.5 mL). The corresponding boc-protected compounds (**5a–5d**, 3.6  $\mu\text{mol}$ ), EDC (1.2 mg, 6  $\mu\text{mol}$ ), HOAt (0.7 mg, 6  $\mu\text{mol}$ ), and DIPEA (2.1  $\mu\text{L}$ , 12  $\mu\text{mol}$ ) dissolved in DMSO (0.5 mL) were added to each compound solution. The mixtures were stirred for 1 h at room temperature, and the reaction progress was monitored by HPLC analysis. If the starting materials (**6a–6d**) were still observed in HPLC, additional 1 equiv. of coupling reagents (EDC, HOAt, and DIPEA) were added. After depletion of the starting materials (**6a–6d**) confirmed by HPLC, the mixture was stopped by adding several drops of TFA, and then purified with HPLC. HPLC conditions for analysis and purification of the compounds were the same as used for **6a–6d**. The final lyophilized compounds were obtained in 56–68 % yields from freeze drying of HPLC fraction containing the product (**7a** (68%, 1.7 mg); **7b** (56%,

1.5 mg); **7c** (63%, 1.8 mg); **7d** (61%, 1.7 mg)).

**7a**: HRMS: calculated exact mass = 838.3300 for C<sub>44</sub>H<sub>48</sub>N<sub>5</sub>O<sub>12</sub> [M+H]<sup>+</sup>, found 838.3297.

**7b**: HRMS: calculated exact mass = 894.3926 for C<sub>48</sub>H<sub>56</sub>N<sub>5</sub>O<sub>12</sub> [M+H]<sup>+</sup>, found 894.3914.

**7c**: HRMS: calculated exact mass = 950.4552 for C<sub>52</sub>H<sub>64</sub>N<sub>5</sub>O<sub>12</sub> [M+H]<sup>+</sup>, found 950.4523.

**7d**: HRMS: calculated exact mass = 926.3824 for C<sub>48</sub>H<sub>56</sub>N<sub>5</sub>O<sub>14</sub> [M+H]<sup>+</sup>, found 926.3790.

### Cell viability studies

The Neuro-2A (N2A) cells were seeded ( $2.5 \times 10^4$  cells/well) onto 96-well plates containing DMEM with 10% FBS and incubated for 24 h. The media was replaced with serum-free medium containing N2 supplement. After 1 h, the Cu complexes **8a'**–**8d'** (2–20  $\mu$ M) were added into the different wells, followed by incubation at 37 °C. The final volume in each well was 100  $\mu$ L with <1% DMSO. After 24 h, each well was treated with 10  $\mu$ L of the Cell Counting Kit-8 (CCK-8) reagent and the cells were incubated for 1 h. Absorbance was measured at 450 using a SpectraMax M2e plate reader (Molecular Devices, USA).

(a)

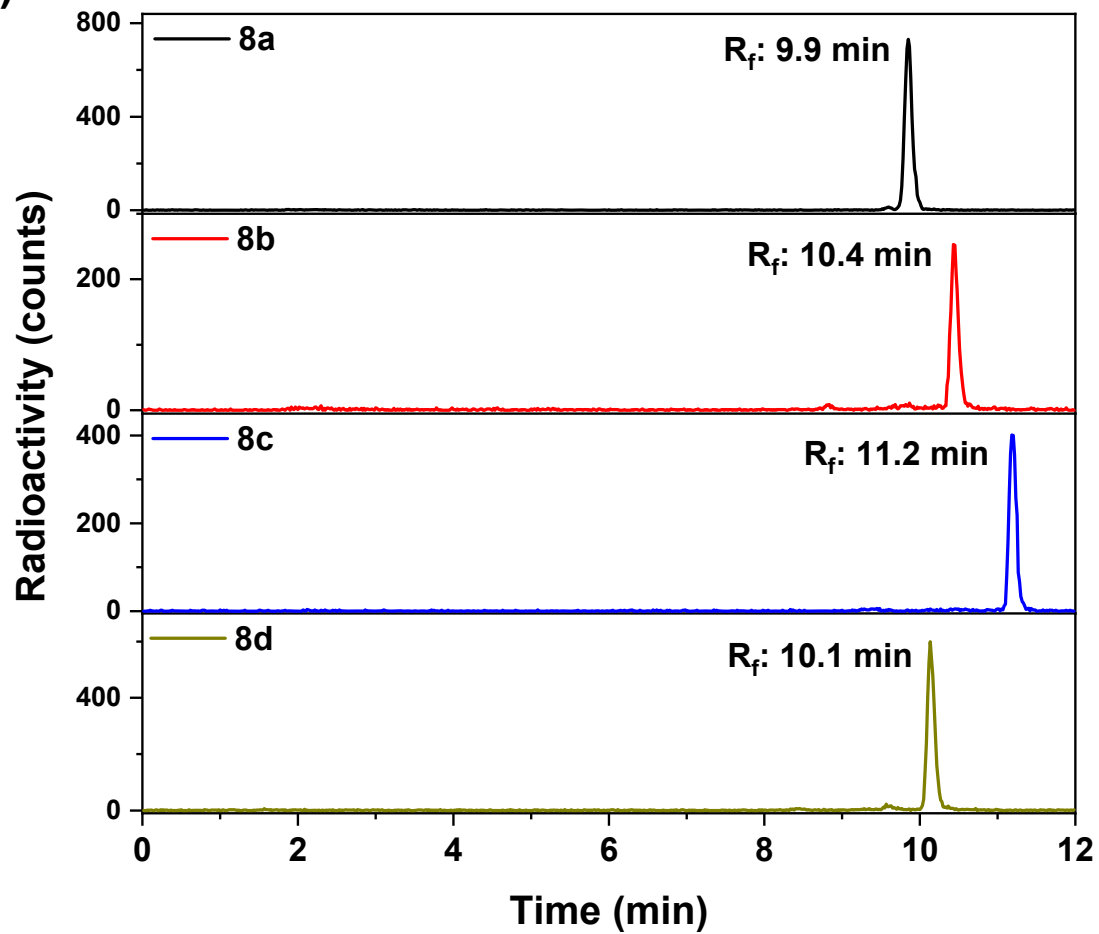



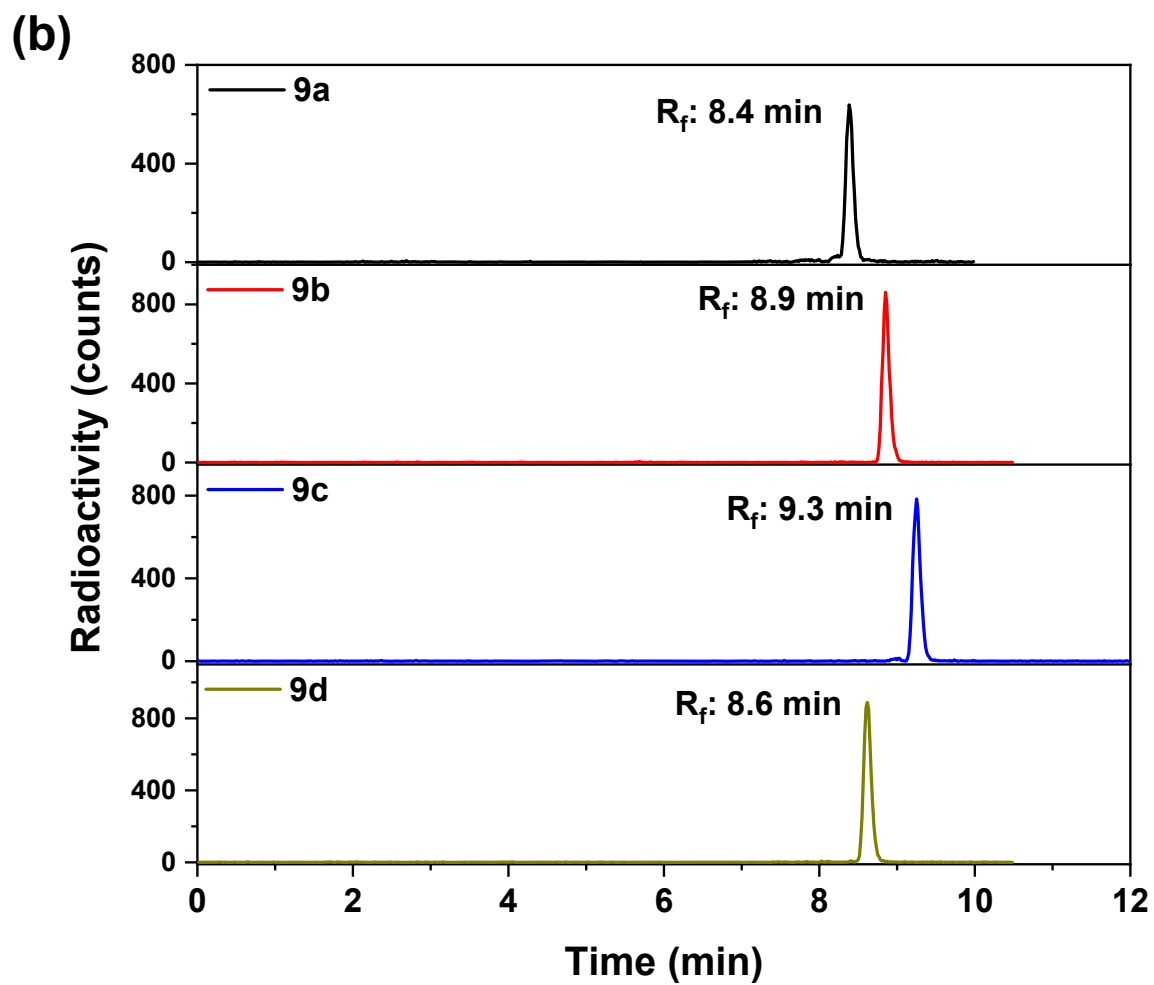

**Figure S1.** Radio-HPLC profiles of  $^{64}\text{Cu}$ -labeled complexes: (a) **8a–8d** and (a) **9a–9d**, showing quantitative radiolabeling. If present, free  $^{64}\text{Cu}$  would appear at 2.1 min.

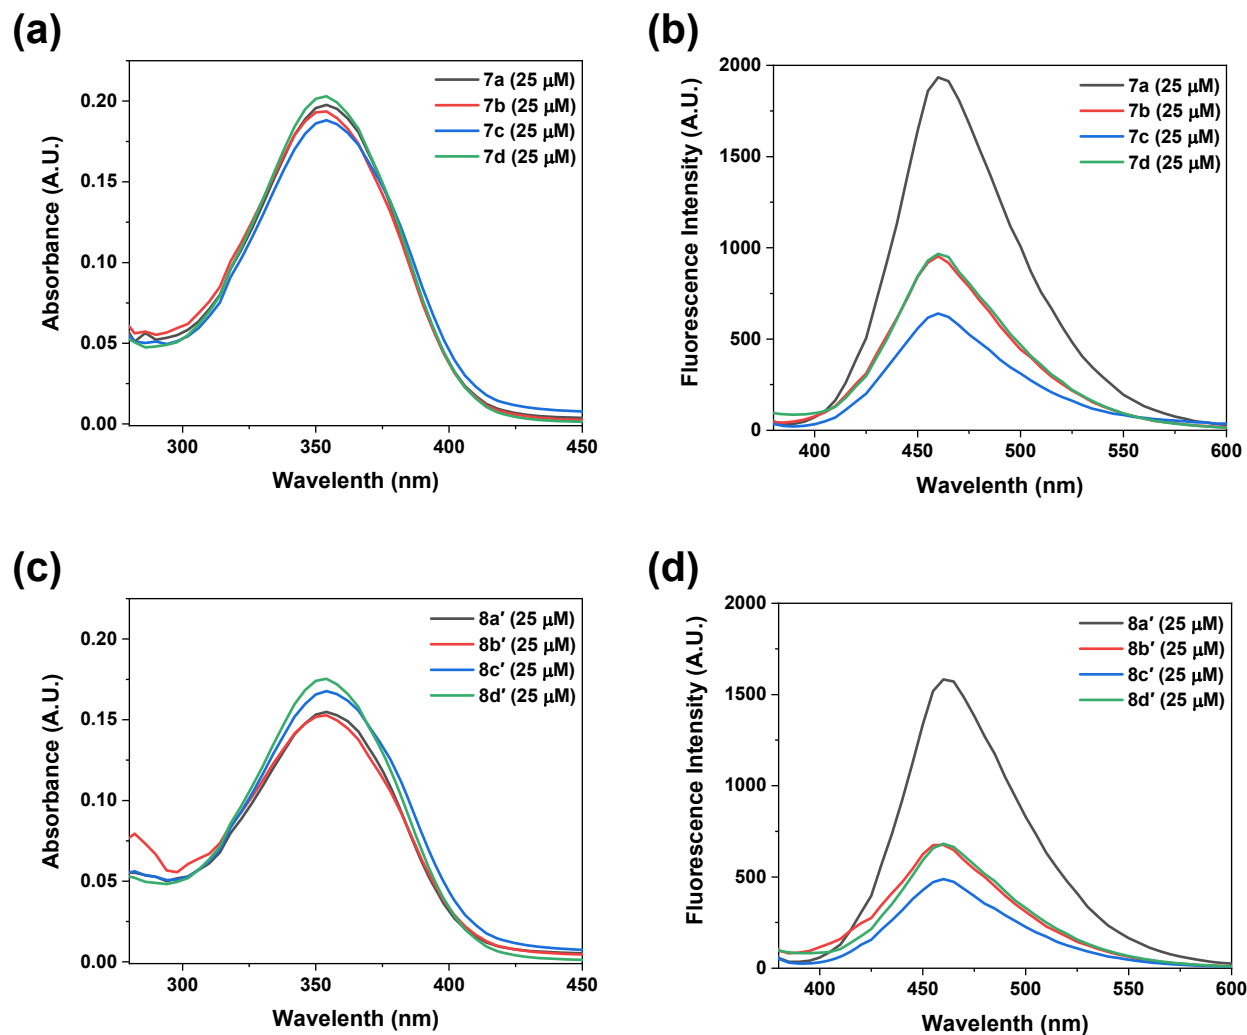

**Figure S2.** Optical properties of compounds (**7a–7d**) and nonradioactive Cu-complexes (**8a'–8d'**). (a) UV-VIS spectra of **7a–7d**. (b) Fluorescence spectra of **7a–7d**. (c) UV-VIS spectra of **8a'–8d'**. (d) Fluorescence spectra of **8a'–8d'**. Fluorescence emission spectra were obtained under excitation at 355 nm.

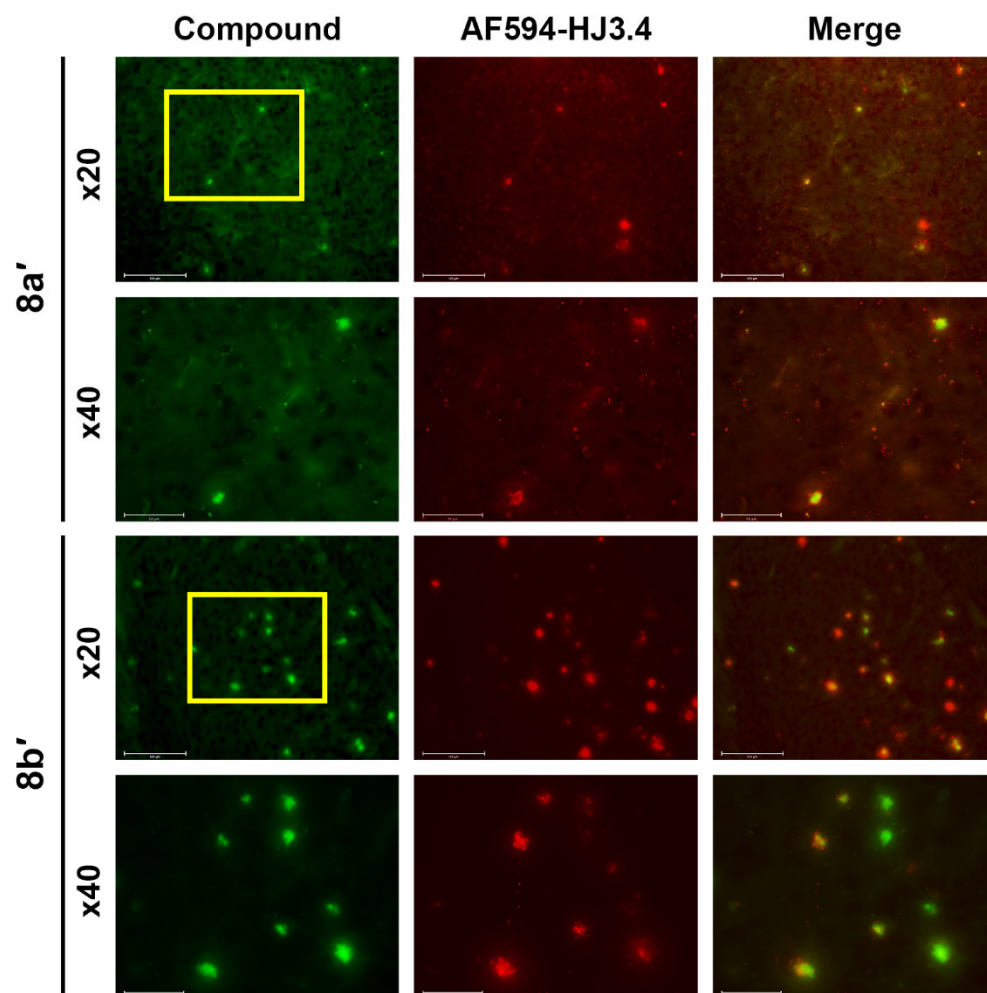

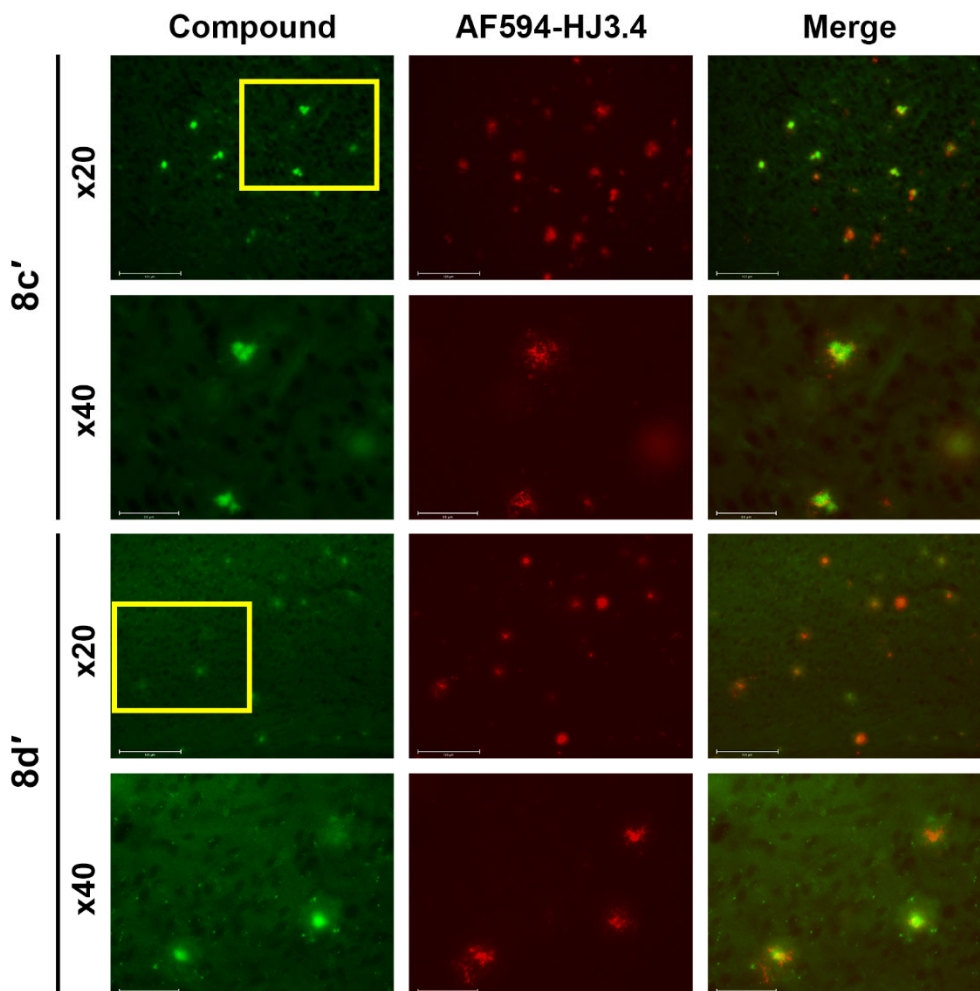

**Figure S3.** Fluorescence microscopy images of 5xFAD mice brain sections incubated with nonradioactive Cu-complexes (**8a'–8d'**). The fluorescence signals from Cu-complexes and AF594-HJ3.4 antibody were monitored at 510/42 nm and 624/40 nm under excitation 470/22 nm and 585/29 nm, respectively. The  $\times 40$  images are the zoomed-in regions highlighted by a yellow rectangle in the “ $\times 20$ ” images. Scale bar: 125  $\mu\text{m}$  for “ $\times 20$ ” and 50  $\mu\text{m}$  for “ $\times 40$ ”.

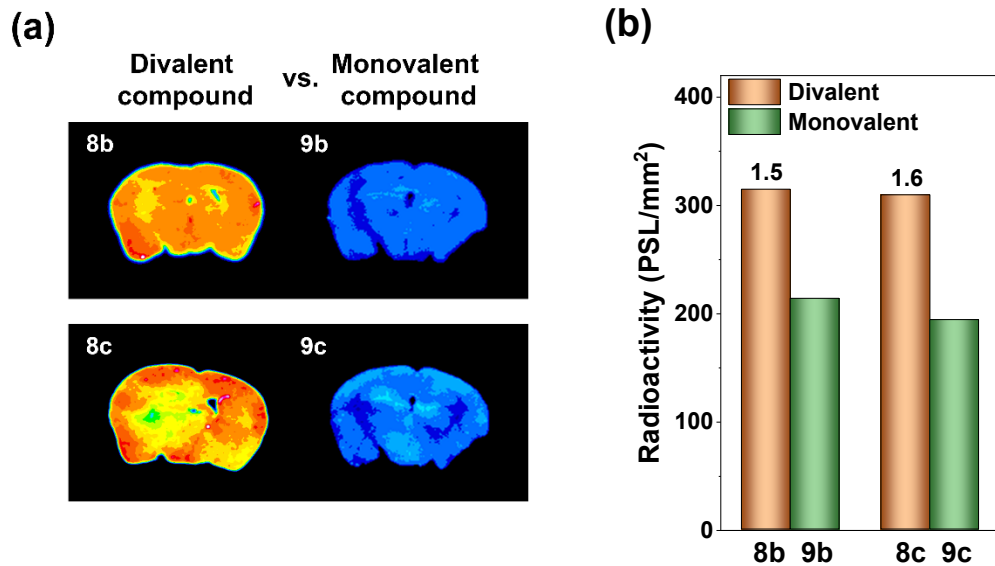

**Figure S4.** (a) Autoradiography images of the brain sections from 5xFAD mice after treatment of **8b–8c** and **9b–9c**. (b) Average intensities of the brain sections in the autoradiography images. The numbers in the bar graph are the intensity ratios of divalent to monovalent: 1.5 and 1.6, respectively.

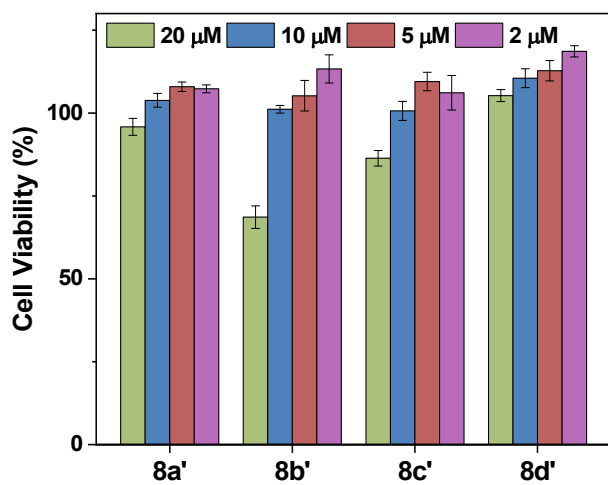

**Figure S5.** Cell viability of N2A cells (normalized to a 1% DMSO control) after 24 h treatment with **8a'**–**8d'**, as assessed by the CCK-8 assay. Concentration: 2–20 μM.

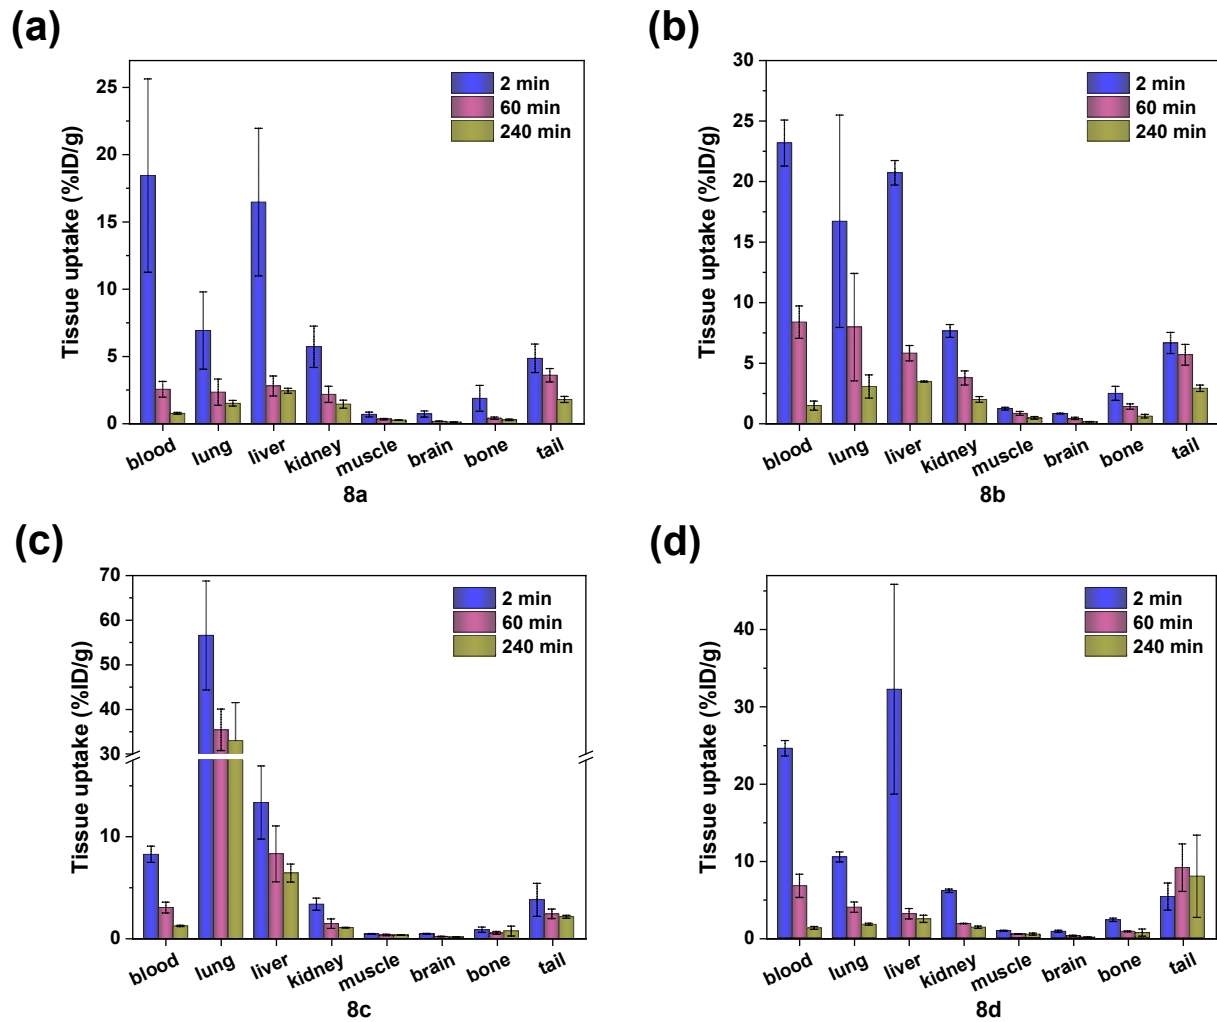

**Figure S6.** Biodistribution results of **8a–8d** in CD-1 mice at 2, 60, and 240 min post-injection.

**Table S1.** Biodistribution results of **8a–8d** in CD-1 mice at 2, 60, and 240 min post-injection.

|              | <b>8a, 2 min</b>   | <b>8a, 60 min</b>  | <b>8a, 240 min</b> | <b>8b, 2 min</b>   | <b>8b, 60 min</b>  | <b>8b, 240 min</b> |
|--------------|--------------------|--------------------|--------------------|--------------------|--------------------|--------------------|
| blood        | 18.43 ± 7.21       | 2.49 ± 0.58        | 0.69 ± 0.07        | 23.17 ± 1.91       | 8.33 ± 1.35        | 1.42 ± 0.38        |
| lung         | 6.88 ± 2.88        | 2.28 ± 0.98        | 1.45 ± 0.20        | 16.69 ± 8.80       | 7.92 ± 4.44        | 3.00 ± 0.96        |
| liver        | 16.45 ± 5.49       | 2.75 ± 0.74        | 2.38 ± 0.18        | 20.70 ± 1.01       | 5.76 ± 0.63        | 3.41 ± 0.04        |
| kidney       | 5.66 ± 1.55        | 2.11 ± 0.60        | 1.39 ± 0.30        | 7.60 ± 0.53        | 3.72 ± 0.59        | 1.92 ± 0.24        |
| muscle       | 0.62 ± 0.17        | 0.27 ± 0.04        | 0.19 ± 0.01        | 1.17 ± 0.11        | 0.77 ± 0.16        | 0.40 ± 0.10        |
| <b>brain</b> | <b>0.65 ± 0.23</b> | <b>0.10 ± 0.03</b> | <b>0.05 ± 0.00</b> | <b>0.76 ± 0.03</b> | <b>0.35 ± 0.10</b> | <b>0.08 ± 0.00</b> |
| bone         | 1.82 ± 0.96        | 0.34 ± 0.09        | 0.22 ± 0.06        | 2.43 ± 0.58        | 1.35 ± 0.23        | 0.55 ± 0.15        |
| tail         | 4.80 ± 1.06        | 3.54 ± 0.50        | 1.73 ± 0.23        | 6.60 ± 0.88        | 5.63 ± 0.85        | 2.85 ± 0.27        |
|              | <b>8c, 2 min</b>   | <b>8c, 60 min</b>  | <b>8c, 240 min</b> | <b>8d, 2 min</b>   | <b>8d, 60 min</b>  | <b>8d, 240 min</b> |
| blood        | 8.21 ± 0.79        | 2.97 ± 0.53        | 1.15 ± 0.07        | 24.60 ± 0.99       | 6.74 ± 1.51        | 1.27 ± 0.18        |
| lung         | 56.56 ± 12.23      | 35.33 ± 4.68       | 32.87 ± 8.56       | 10.50 ± 0.65       | 3.97 ± 0.68        | 1.75 ± 0.13        |
| liver        | 13.30 ± 3.61       | 8.26 ± 2.75        | 6.37 ± 0.89        | 32.25 ± 13.61      | 3.12 ± 0.65        | 2.45 ± 0.47        |
| kidney       | 3.30 ± 0.60        | 1.39 ± 0.48        | 1.00 ± 0.03        | 6.09 ± 0.23        | 1.84 ± 0.02        | 1.37 ± 0.17        |
| muscle       | 0.37 ± 0.03        | 0.28 ± 0.07        | 0.28 ± 0.02        | 0.91 ± 0.06        | 0.50 ± 0.01        | 0.48 ± 0.15        |
| <b>brain</b> | <b>0.38 ± 0.04</b> | <b>0.13 ± 0.02</b> | <b>0.08 ± 0.01</b> | <b>0.83 ± 0.14</b> | <b>0.27 ± 0.05</b> | <b>0.09 ± 0.02</b> |
| bone         | 0.79 ± 0.27        | 0.48 ± 0.13        | 0.67 ± 0.48        | 2.34 ± 0.23        | 0.84 ± 0.08        | 0.68 ± 0.46        |
| tail         | 3.73 ± 1.62        | 2.35 ± 0.47        | 2.06 ± 0.14        | 5.35 ± 1.76        | 9.10 ± 3.09        | 7.98 ± 5.34        |

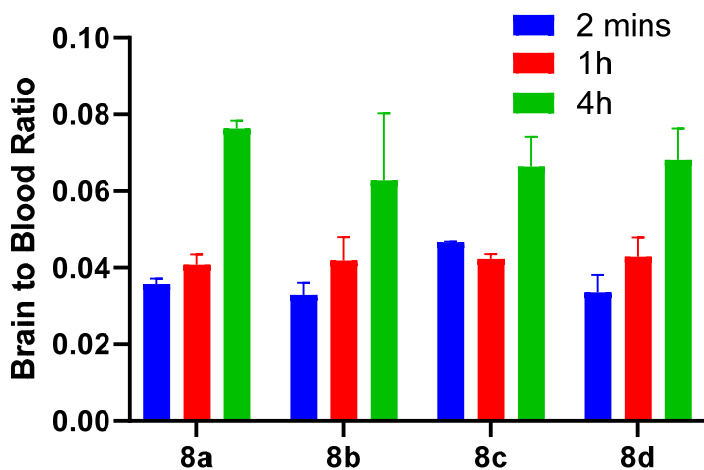

**Figure S7.** Brain to blood ratios from the biodistribution results of **8a–8d** in CD-1 mice at 2, 60, and 240 min post-injection.



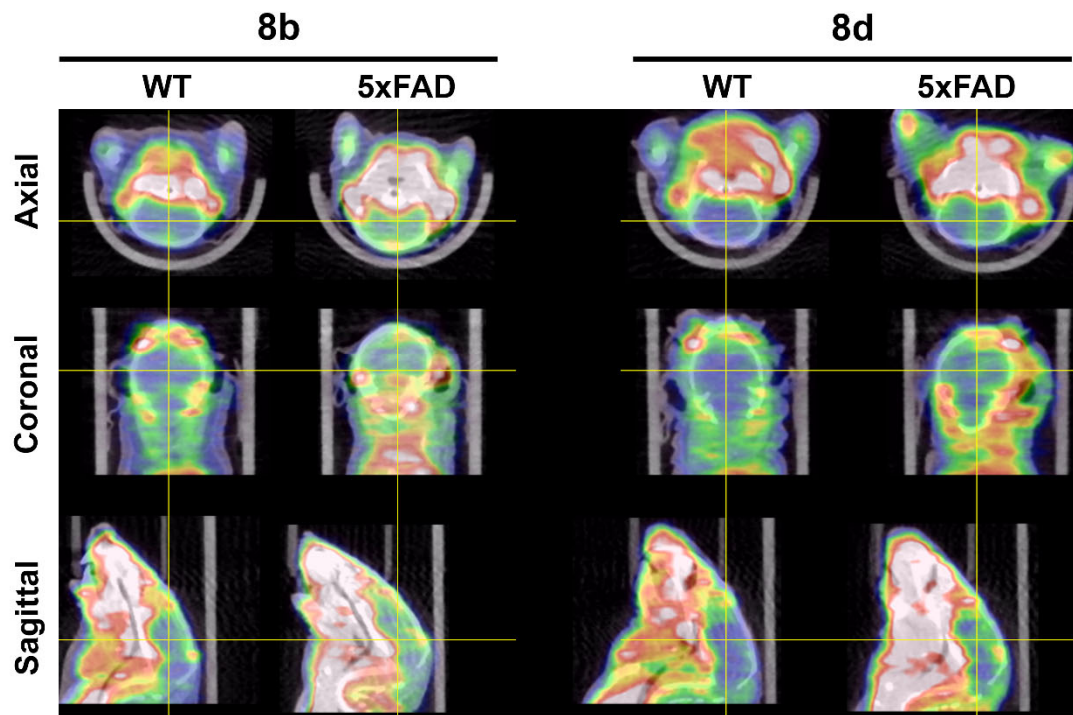

**Figure S8.** Representative axial, coronal, and sagittal PET/CT images of **8b** and **8d** in WT and 5xFAD mice with dynamic scans summed from 7.5 to 27.5 min post-injection.

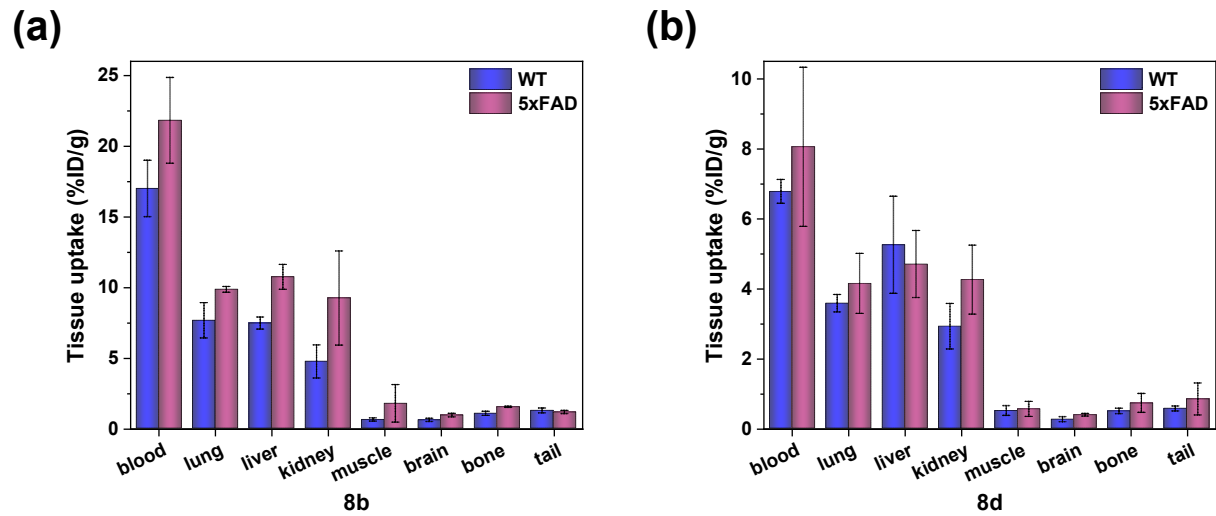

**Figure S9.** Post-PET biodistribution results of (a) **8b** and (b) **8d** in WT and 5xFAD mice after PET/CT scans.

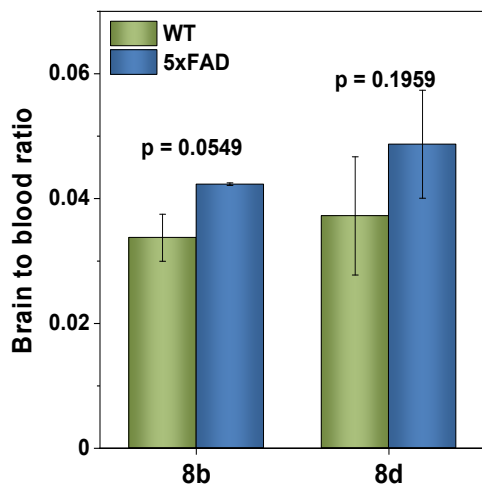

**Figure S10.** Brain to blood ratios from the post-PET biodistribution results of **8b** and **8d** in WT and 5xFAD mice after PET/CT scans.

(a)

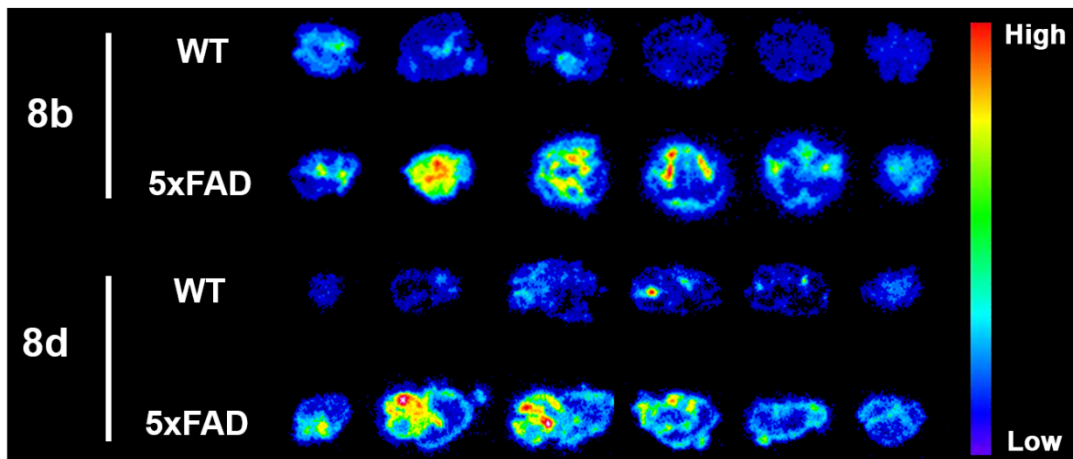

(b)

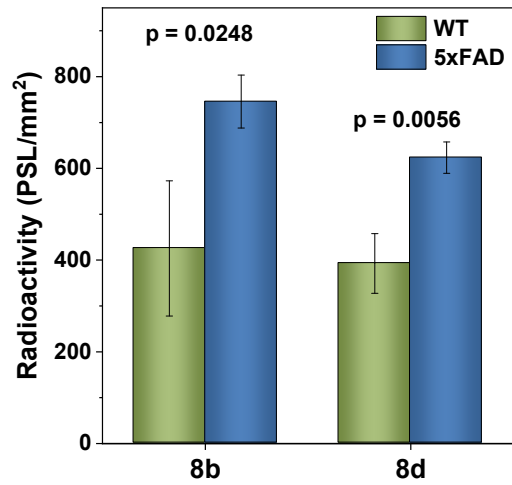

**Figure S11.** (a) Representative post-PET autoradiography images of **8b** and **8d**. (b) Average intensities of the brain sections treated with **8b** and **8d** in post-autoradiography.

# $^1\text{H-NMR}$ , $^{13}\text{C-NMR}$ , mass spectra, and HPLC profiles

## $^1\text{H-NMR}$ and $^{13}\text{C-NMR}$ spectra of **2**

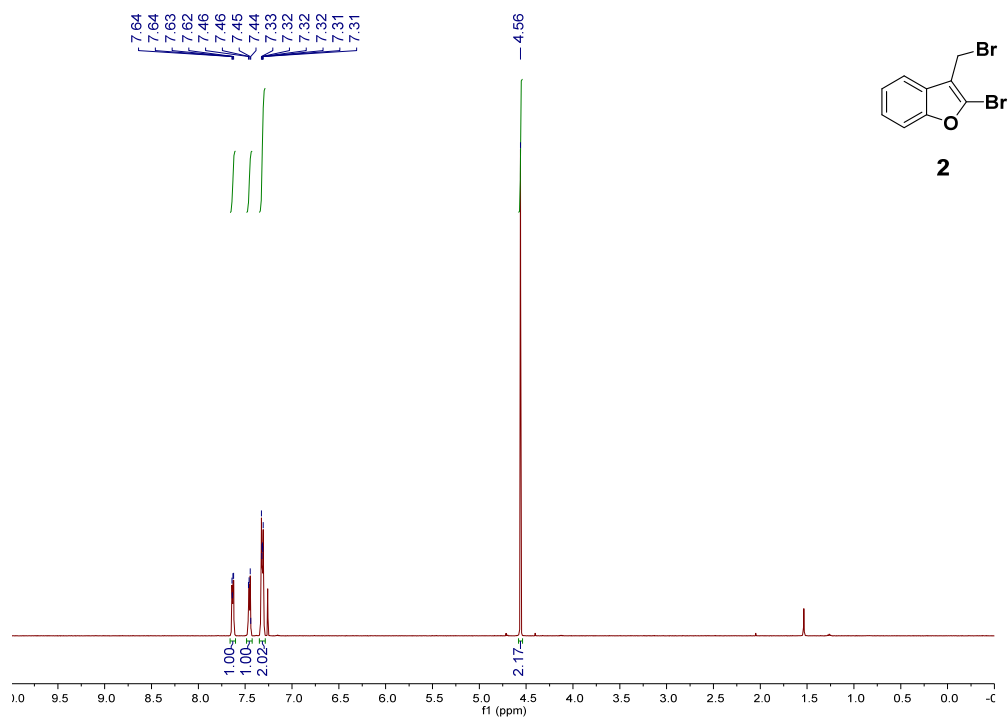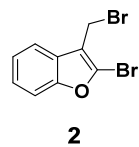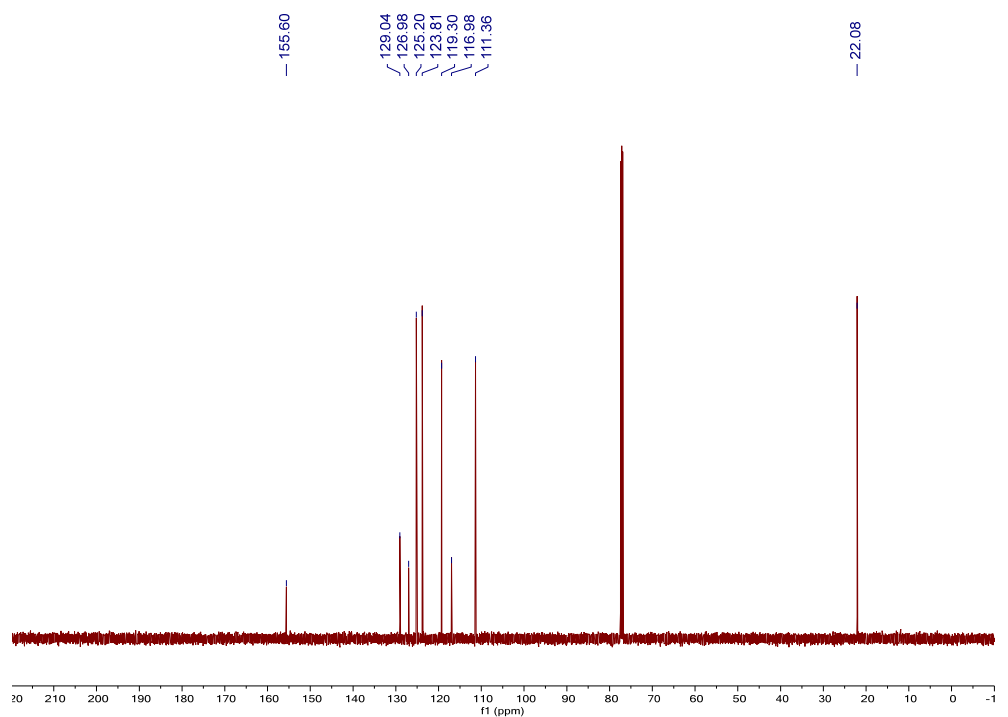

*<sup>1</sup>H-NMR, <sup>13</sup>C-NMR, and HR-MS spectra of 3a*

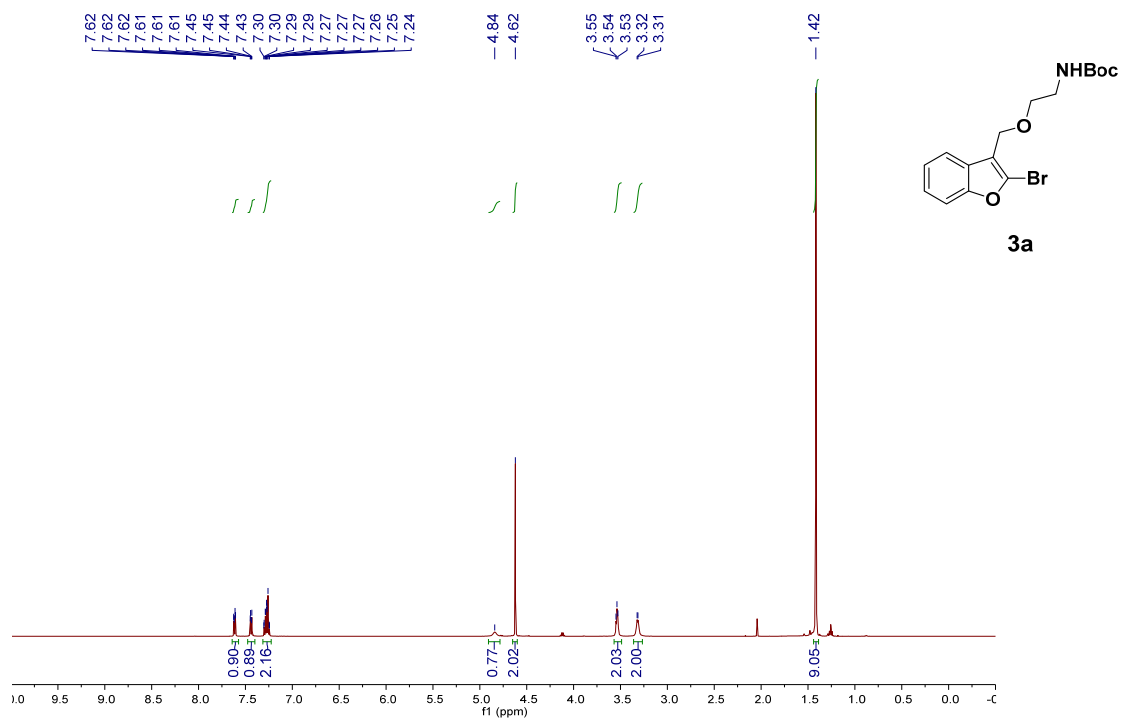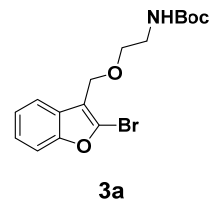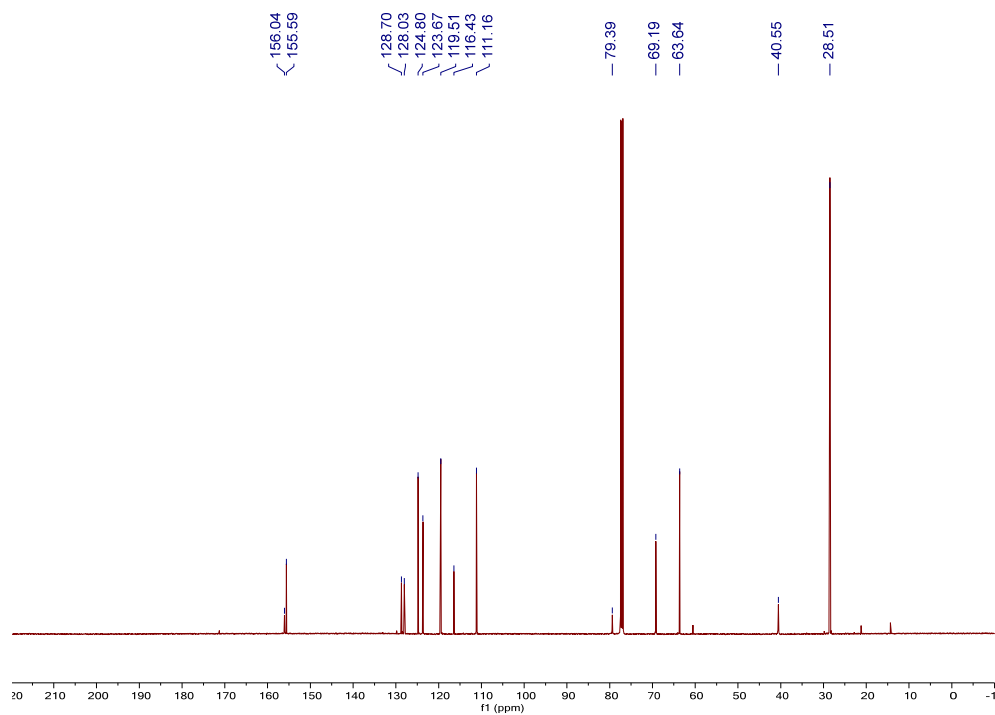

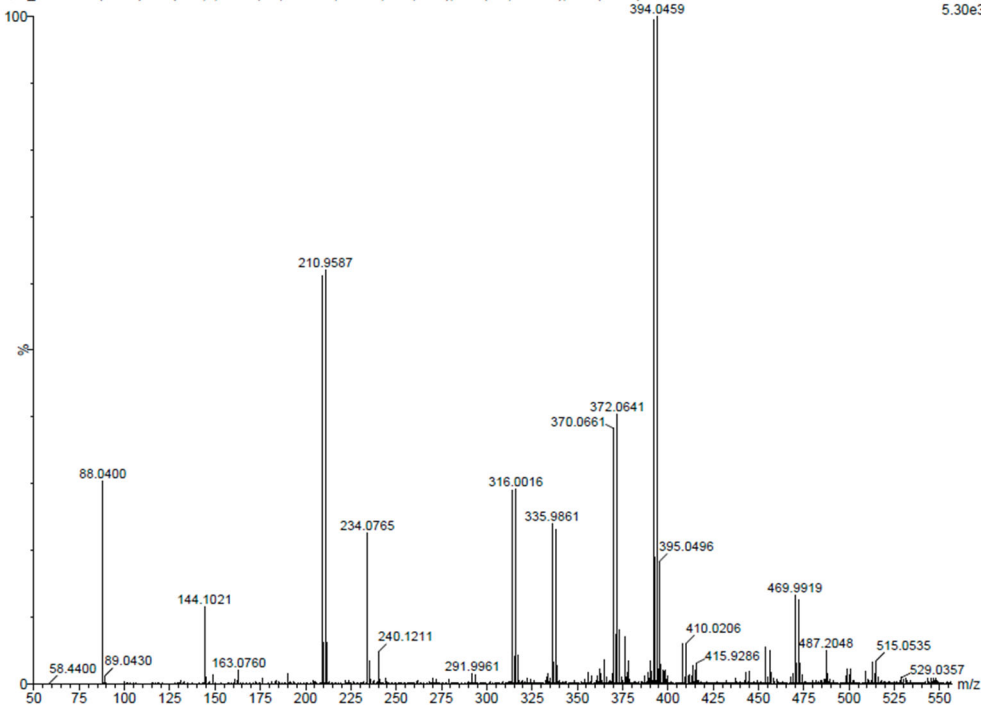

<sup>1</sup>H-NMR, <sup>13</sup>C-NMR, and HR-MS spectra of **3b**

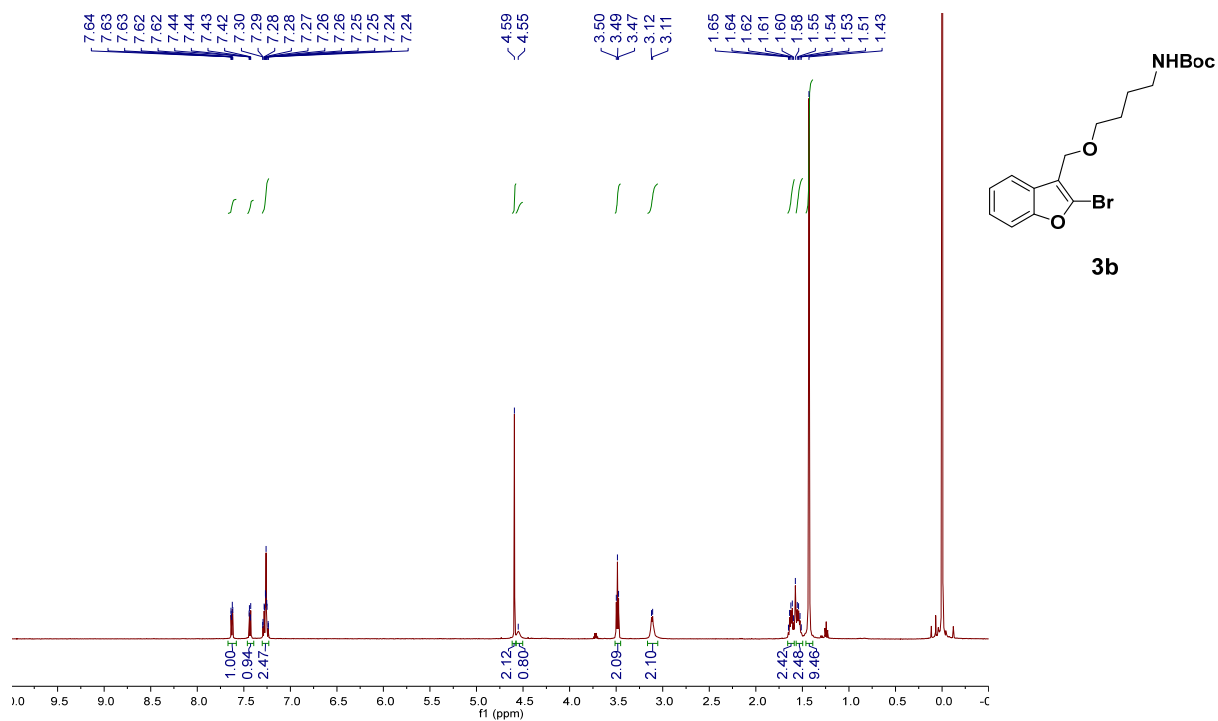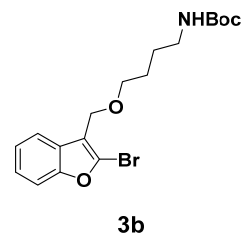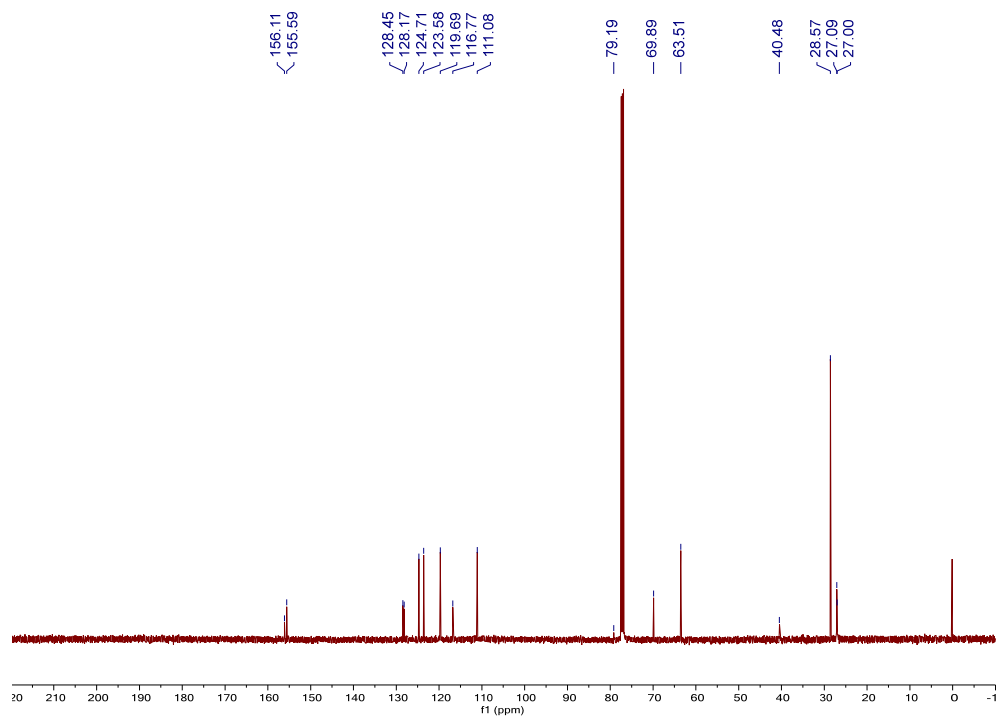

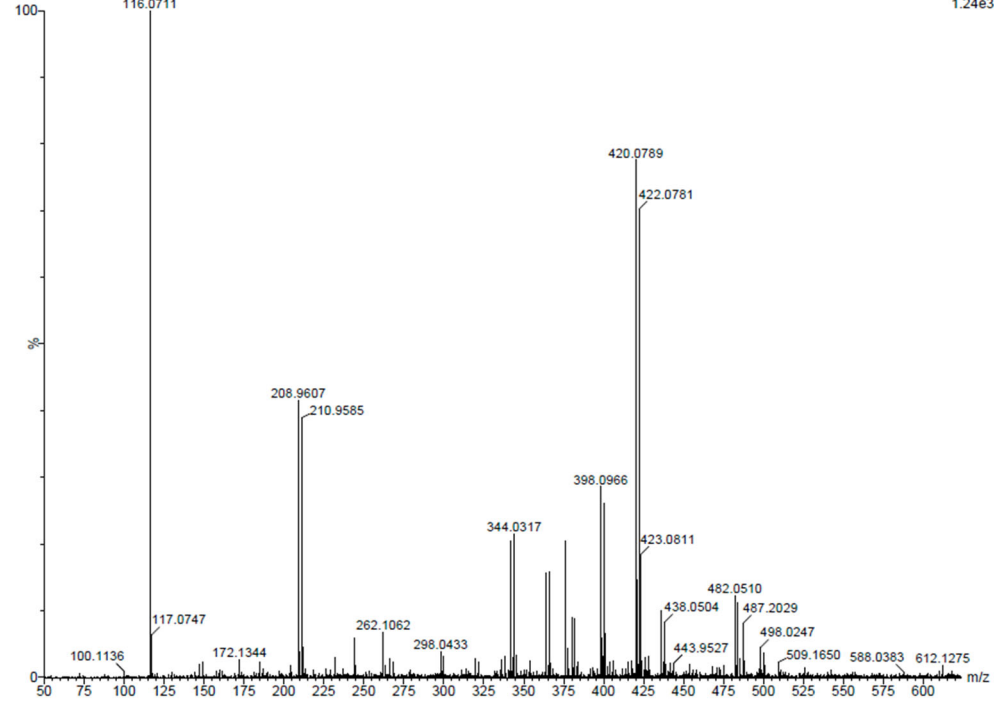



<sup>1</sup>H-NMR, <sup>13</sup>C-NMR, and HR-MS spectra of **3c**

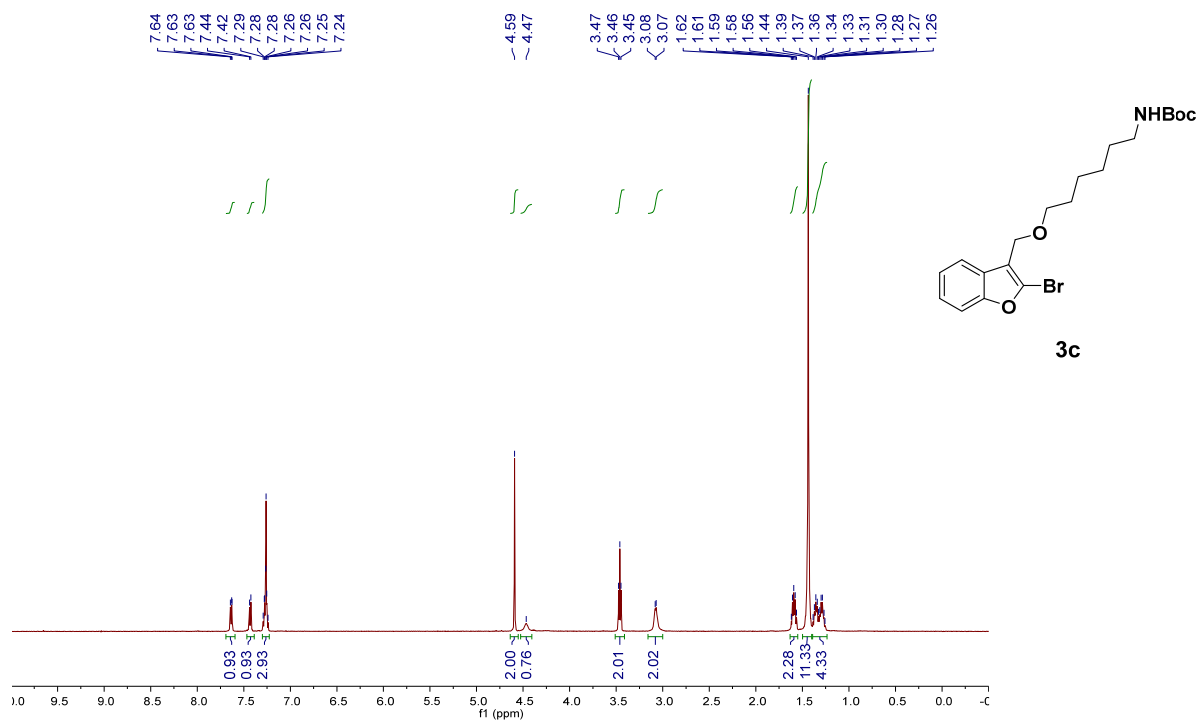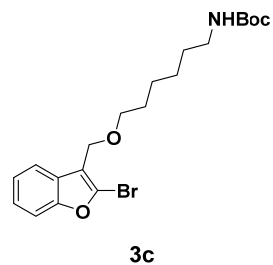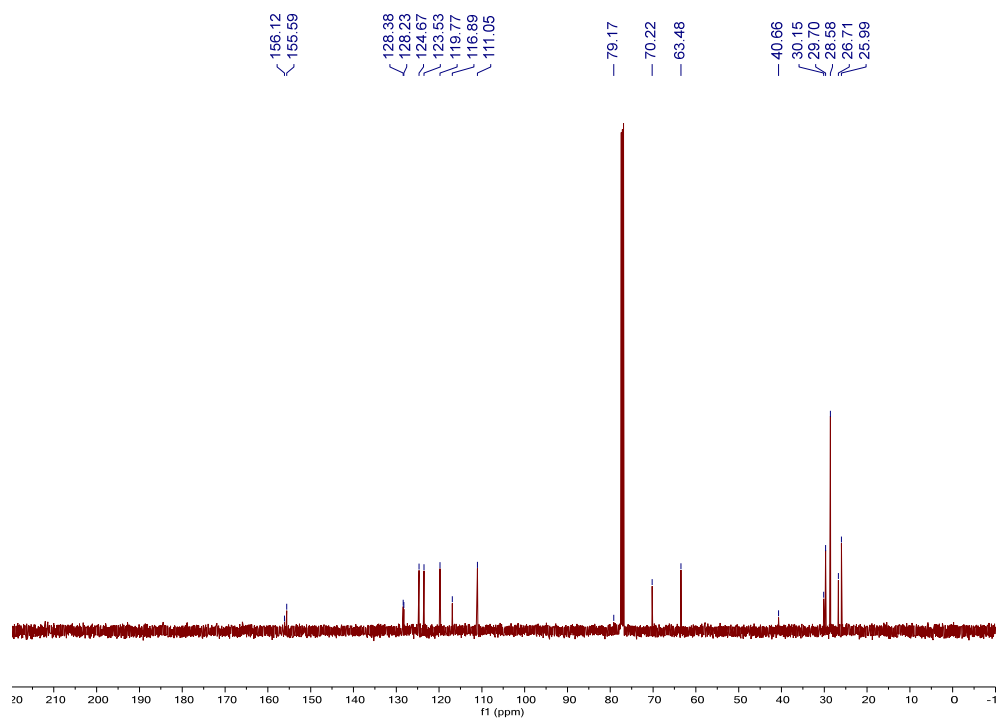

Qtof\_73807 55 (2.100) AM (Cen,5, 80.00, Ar,14000.0,558.36,0.70,LS 5); Sm (SG, 2x5.00); Cm (55:60)

1: TOF MS ES+  
6.88e3

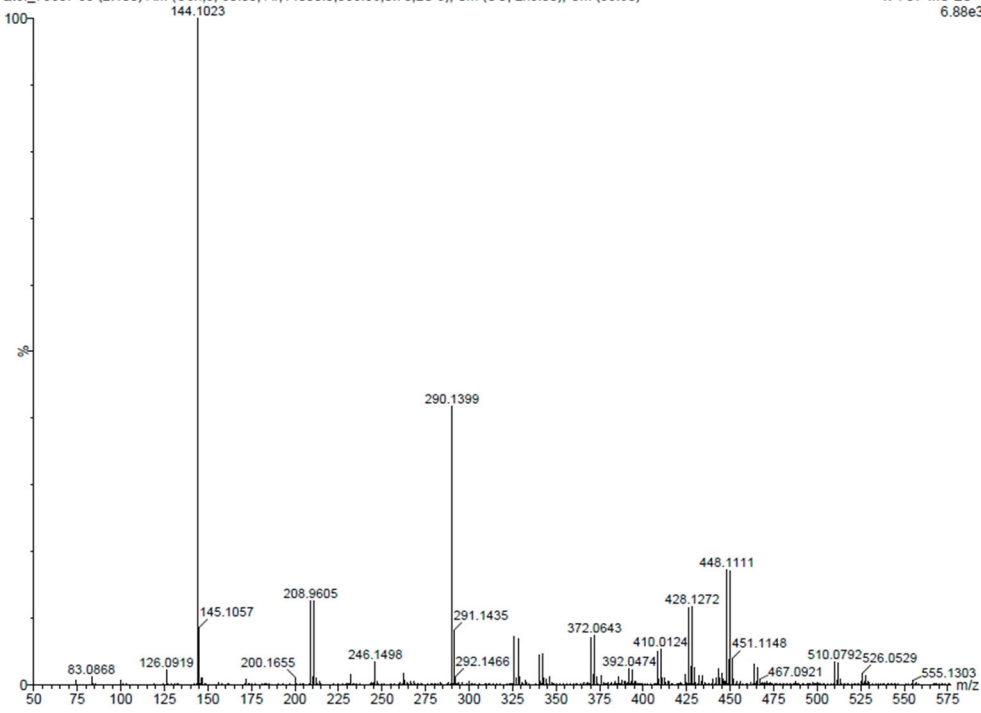

*<sup>1</sup>H-NMR, <sup>13</sup>C-NMR, and HR-MS spectra of 3d*

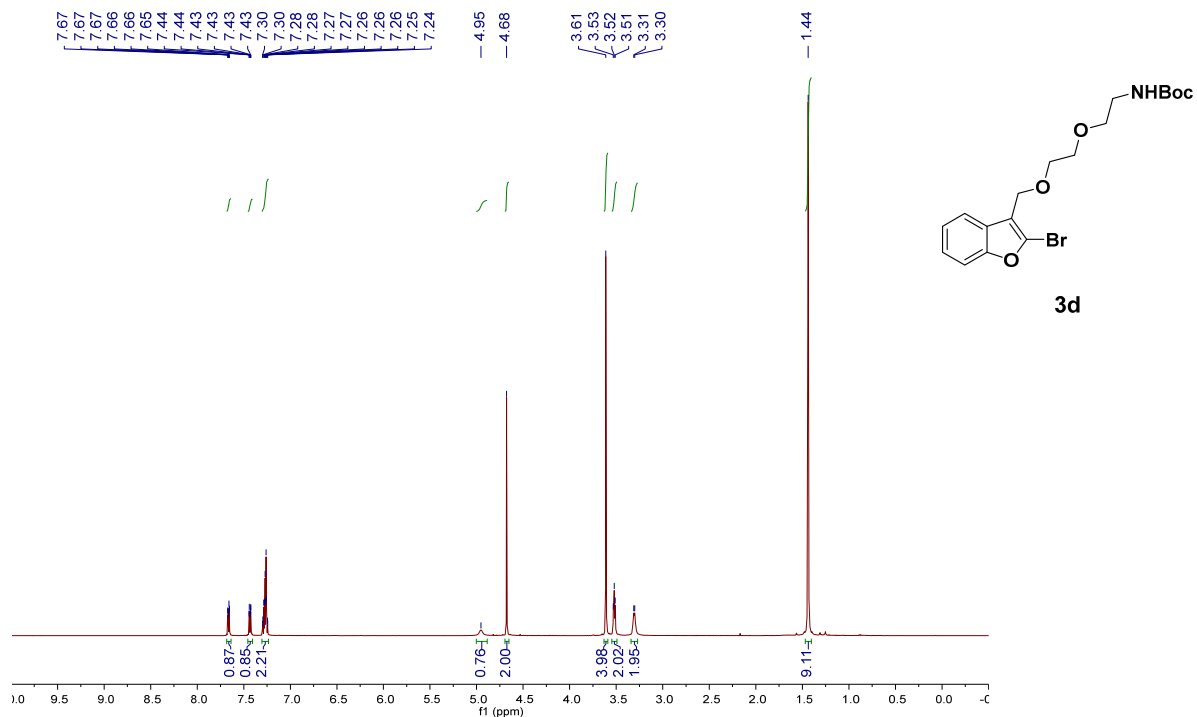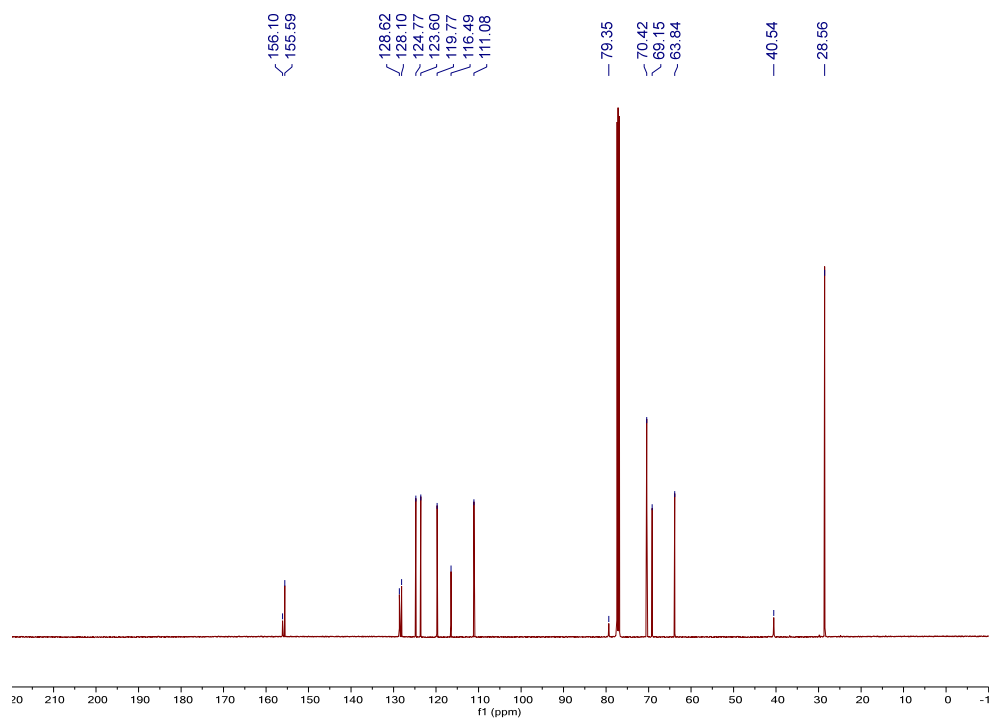

Qtof\_73808 49 (1.863) AM (Cen,5, 80.00, Ar,14000.0,558.36,0.70,LS 5); Sm (SG, 2x5.00); Cm (46:50)

1: TOF MS ES+  
4.41e3

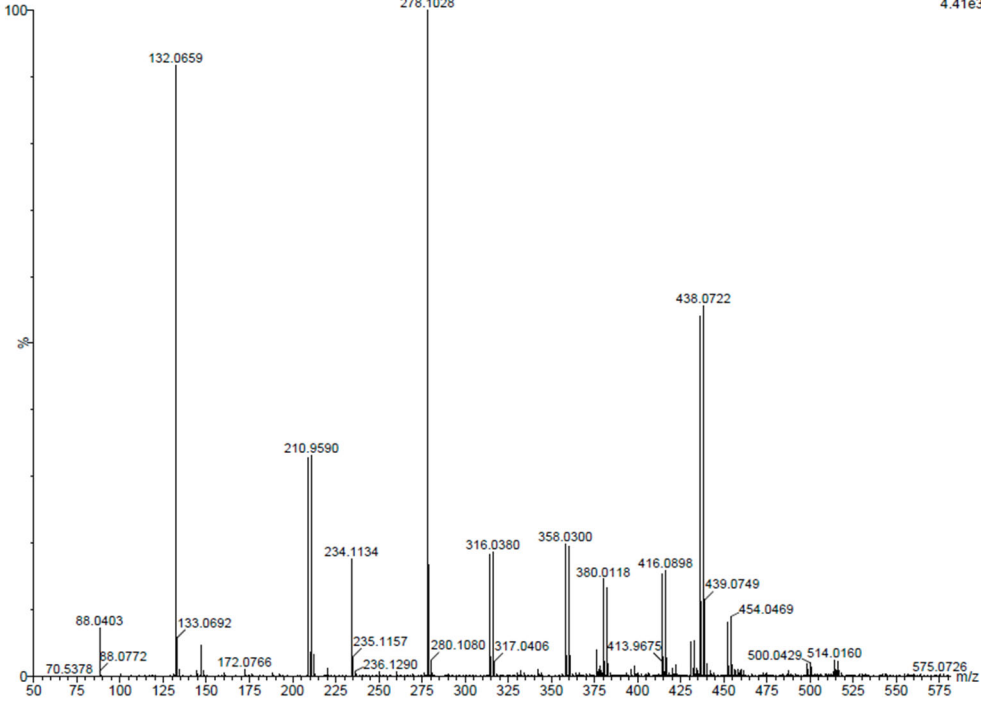

*<sup>1</sup>H-NMR, <sup>13</sup>C-NMR, and HR-MS spectra of 4a*

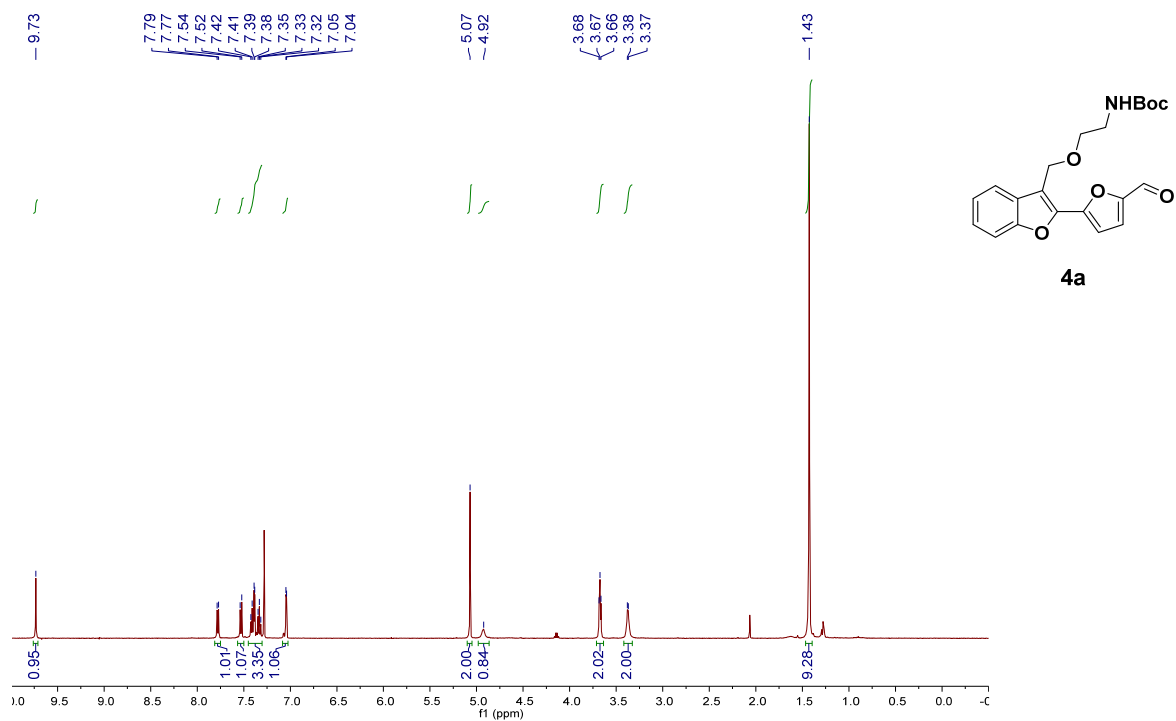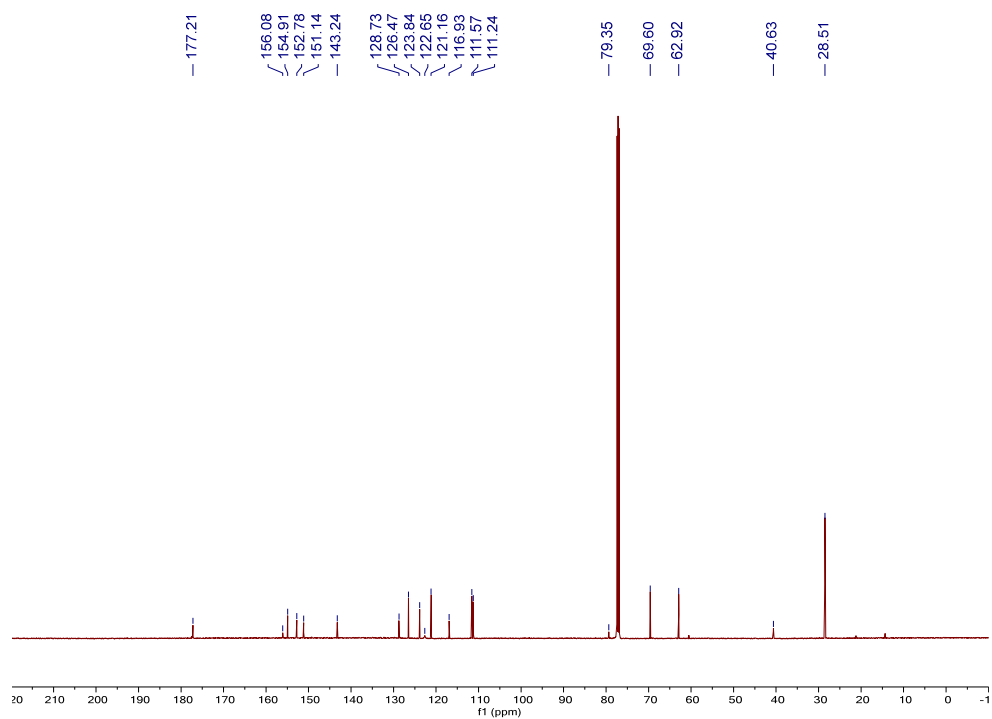

Qtof\_73809 50 (1.897) AM (Cen,5, 80.00, Ar,14000.0,558.36,0.70,LS 5); Sm (SG, 2x5.00); Cm (46:52)

1: TOF MS ES+  
1.39e4

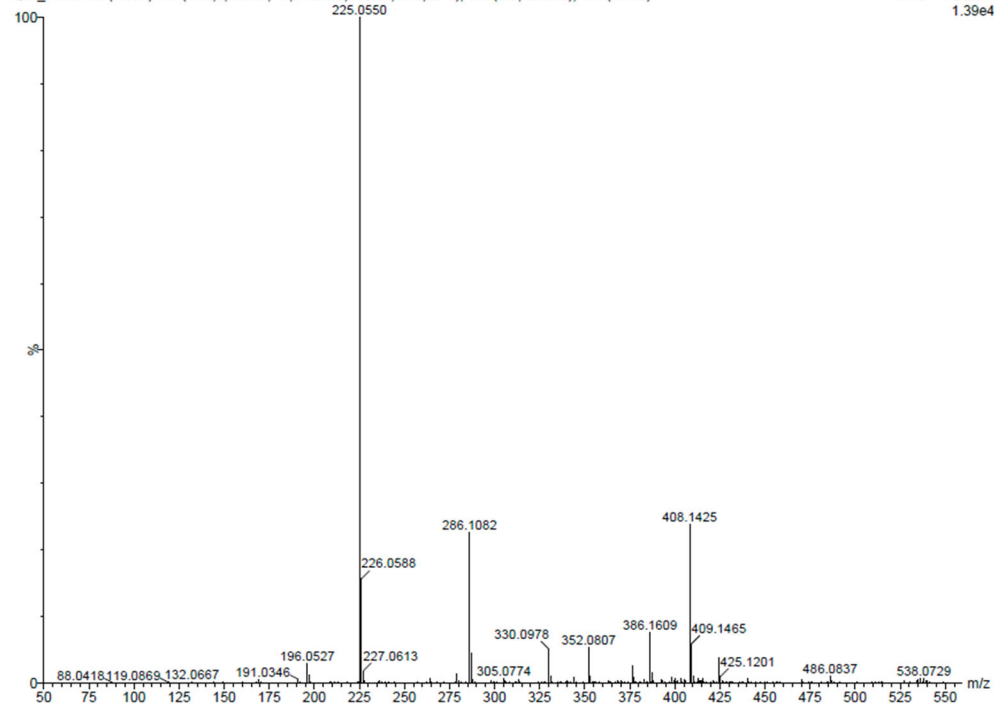

<sup>1</sup>H-NMR, <sup>13</sup>C-NMR, and HR-MS spectra of **4b**

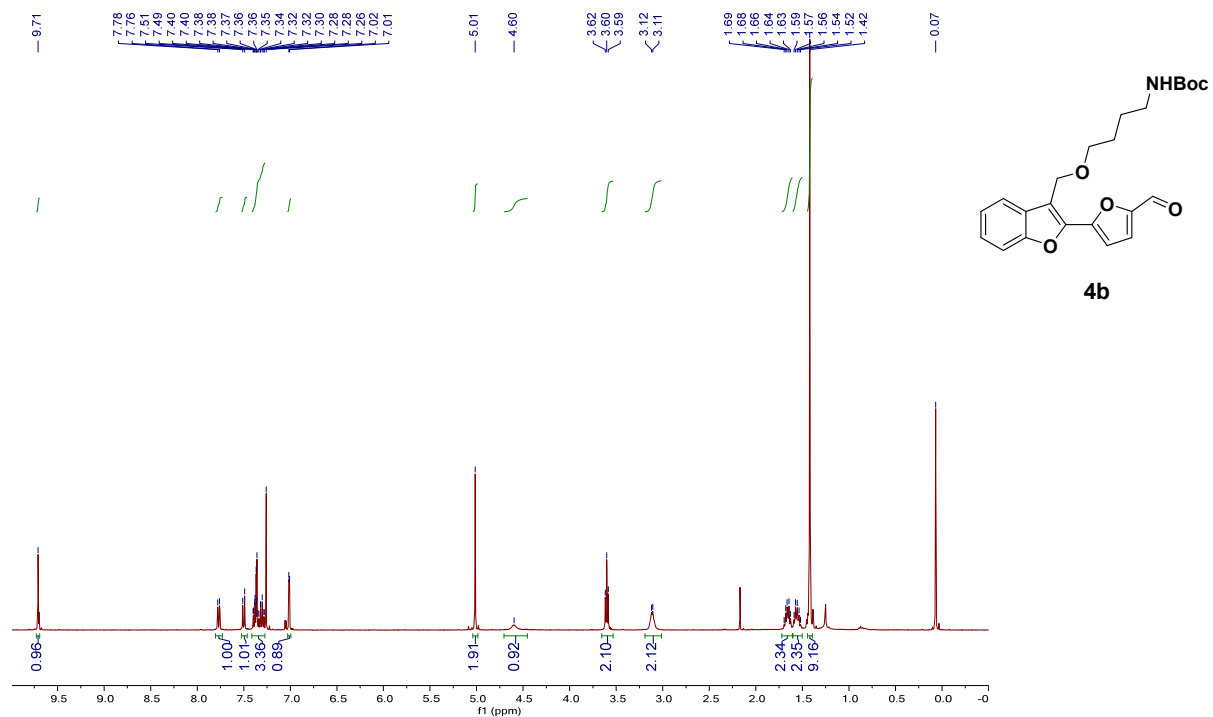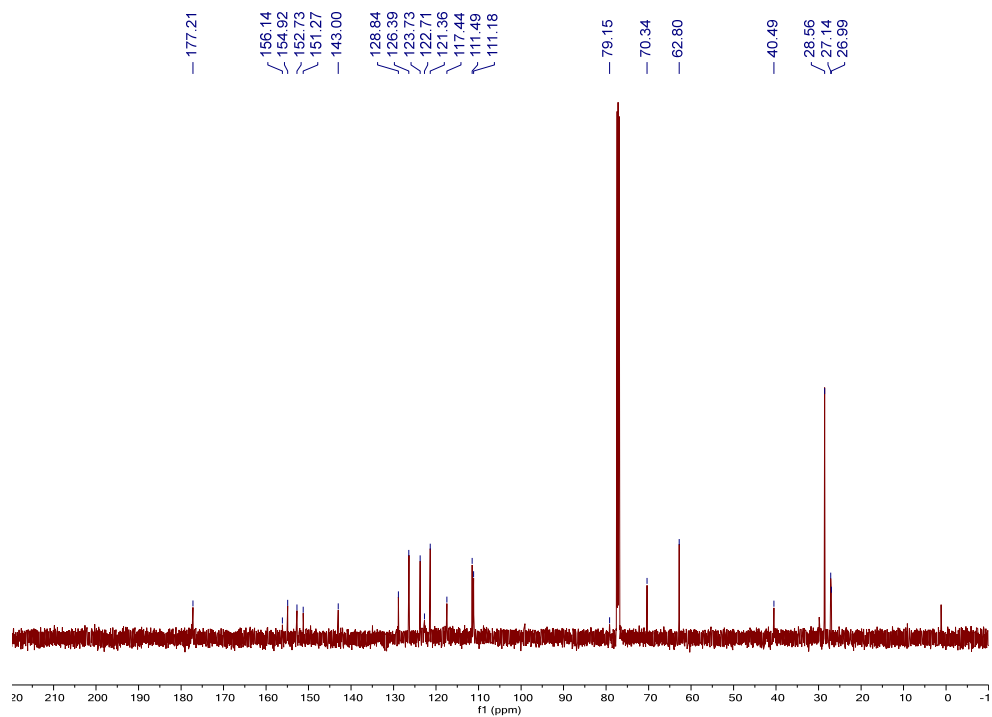

Qtof\_73810 49 (1.863) AM (Cen,5, 80.00, Ar,14000.0,558.36,0.70,LS 5); Sm (SG, 2x5.00); Cm (46:55)

1: TOF MS ES+  
1.18e4

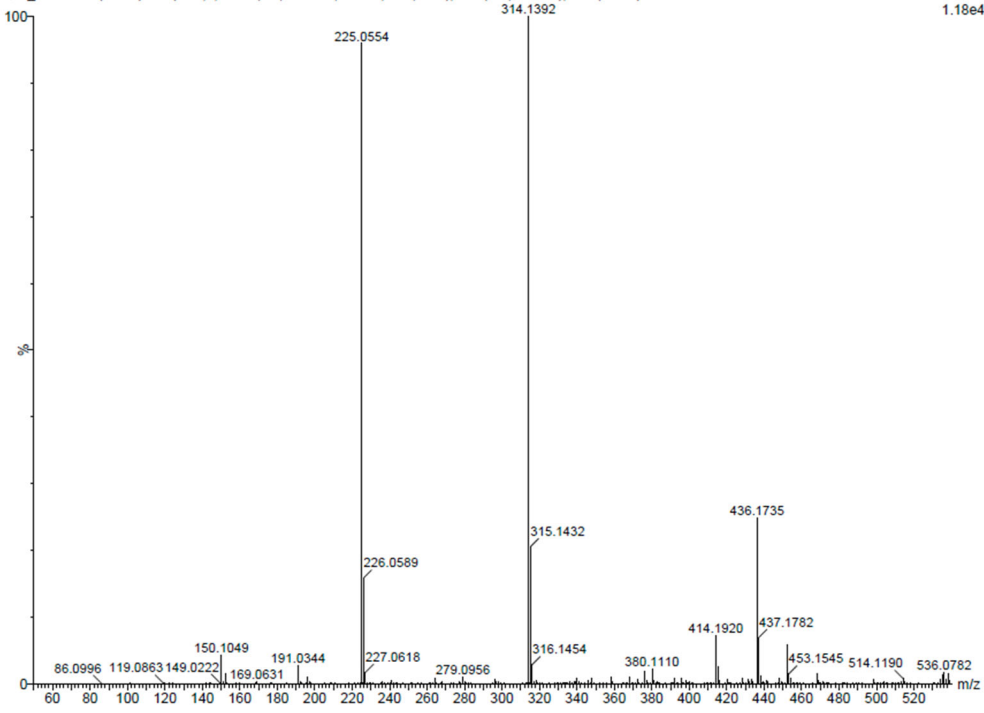



*<sup>1</sup>H-NMR, <sup>13</sup>C-NMR, and HR-MS spectra of 4c*

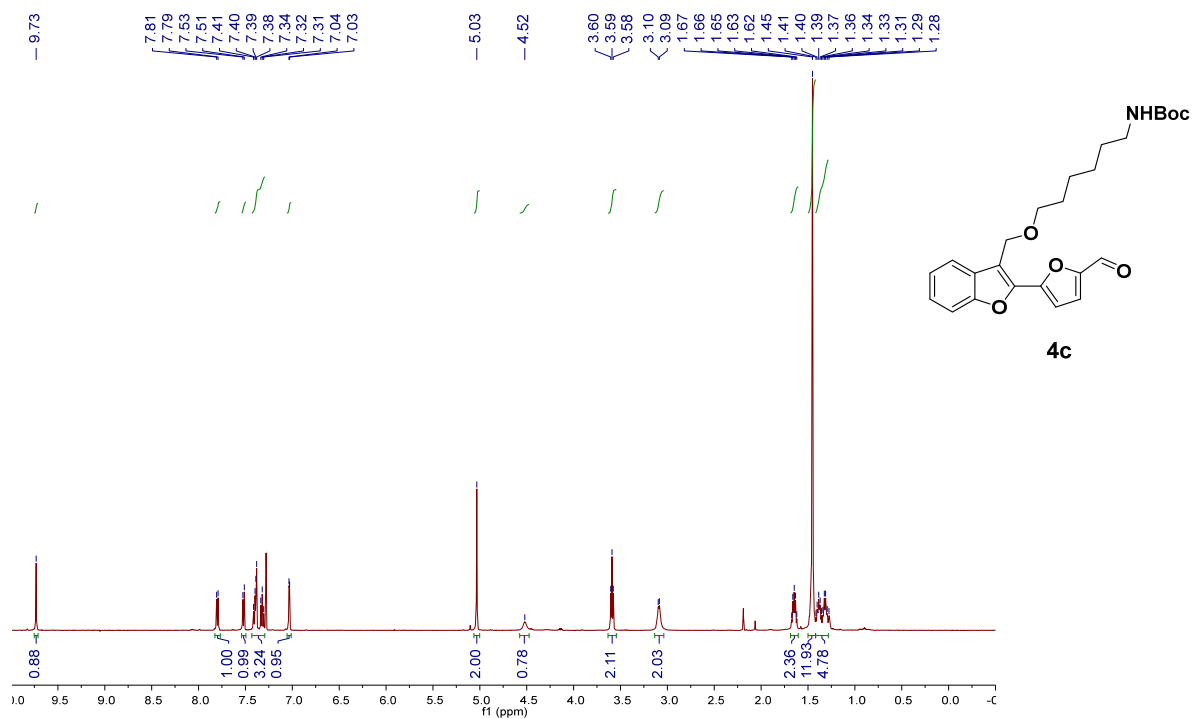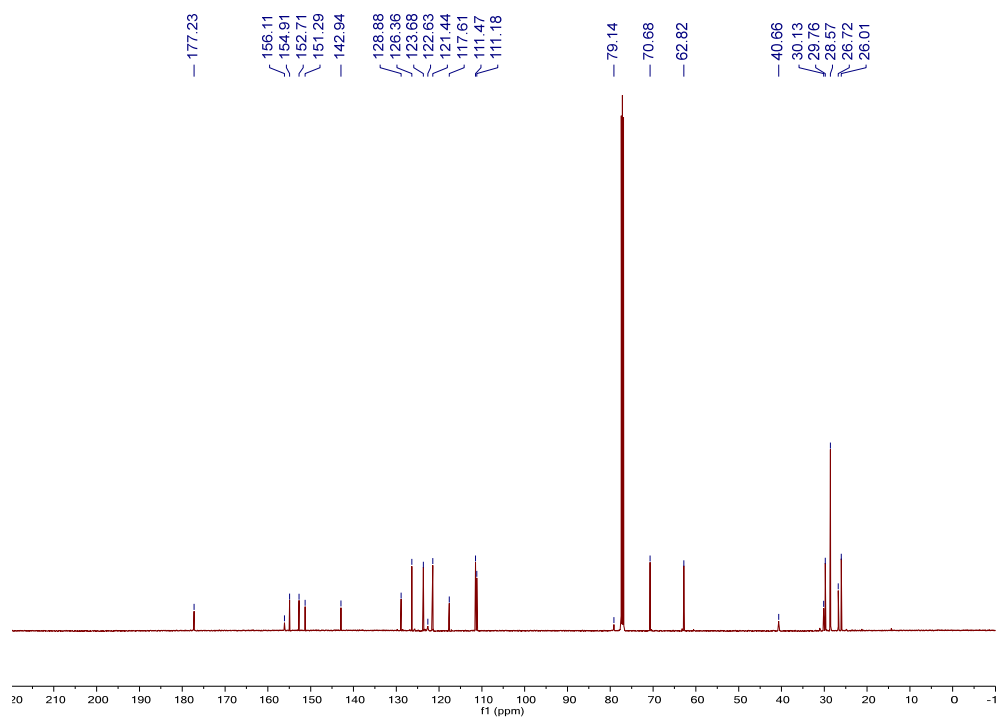

Qtof\_73811 50 (1.897) AM (Cen,5, 80.00, Ar,14000.0,558.36,0.70,LS 5); Sm (SG, 2x5.00); Cm (49:55)

1: TOF MS ES+  
1.25e4

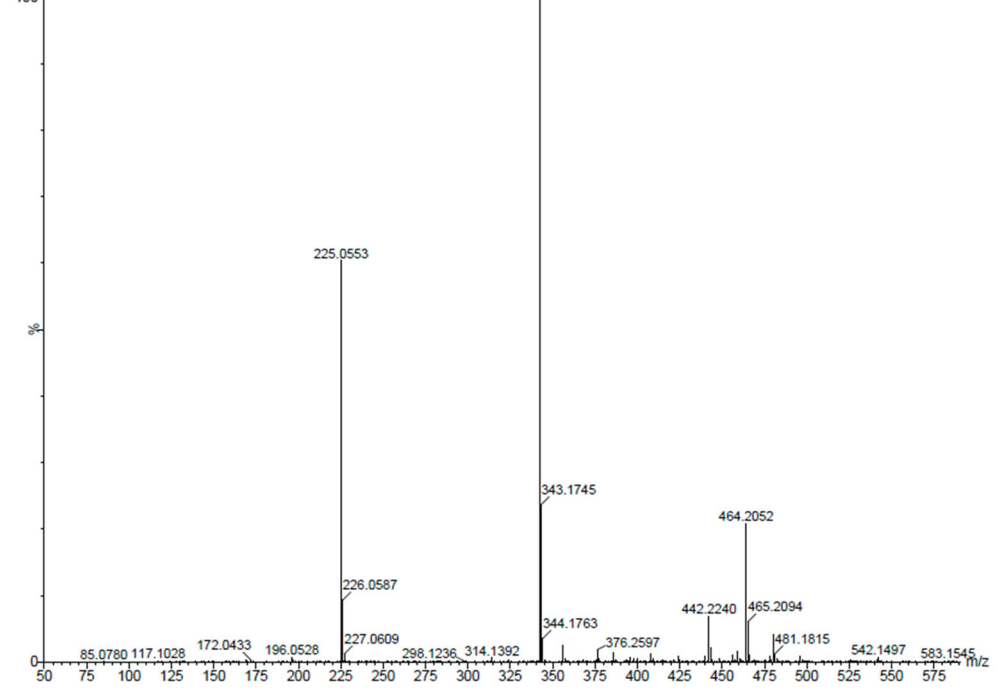

*<sup>1</sup>H-NMR, <sup>13</sup>C-NMR, and HR-MS spectra of 4d*

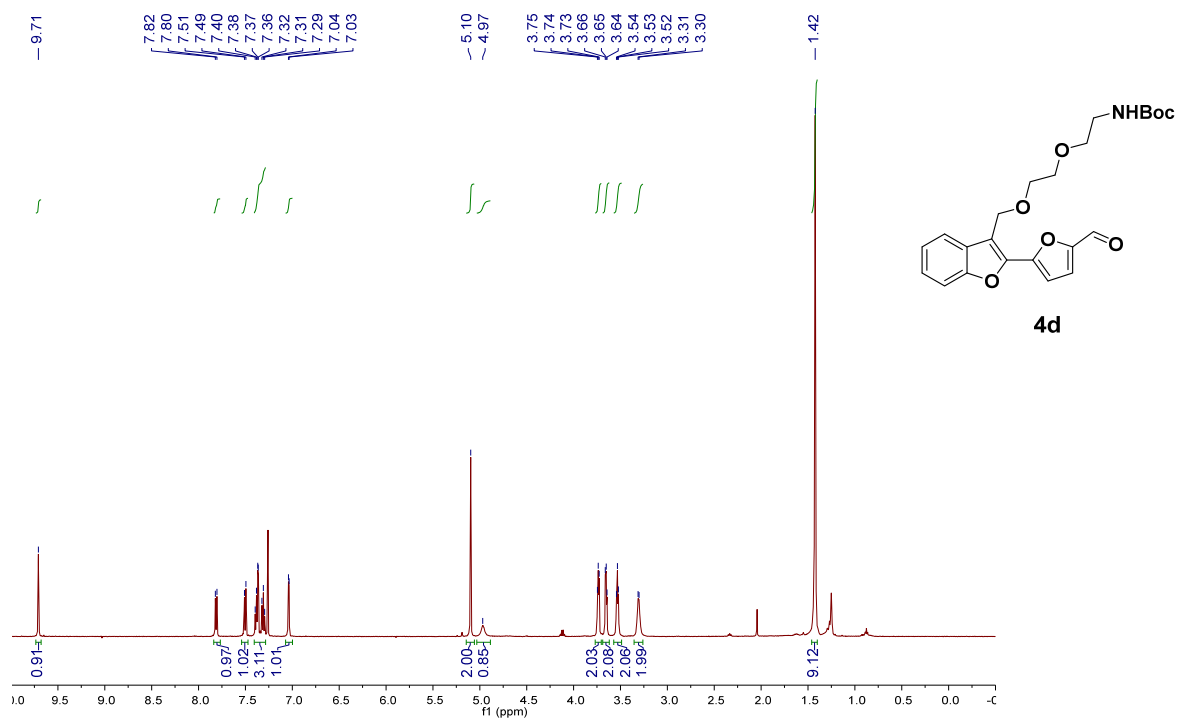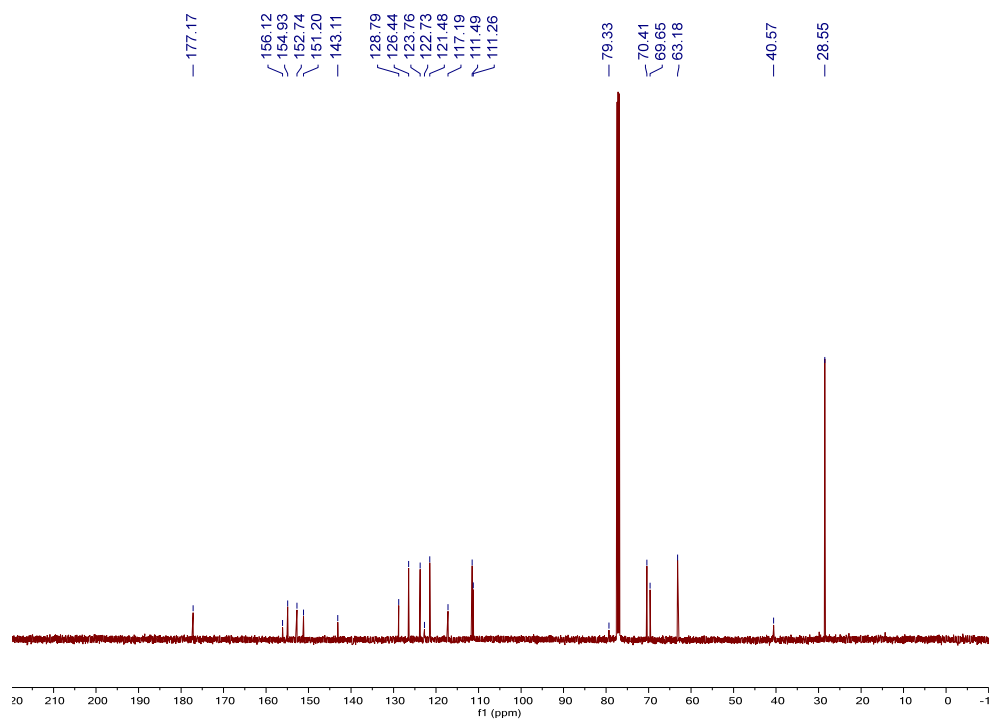

Qtof\_73812.47 (1.796) AM (Cen,5, 80.00, Ar,14000,0.558,36,0.70,LS 5); Sm (SG, 2x5.00); Cm (44:47)

1: TOF MS ES+  
1.34e4

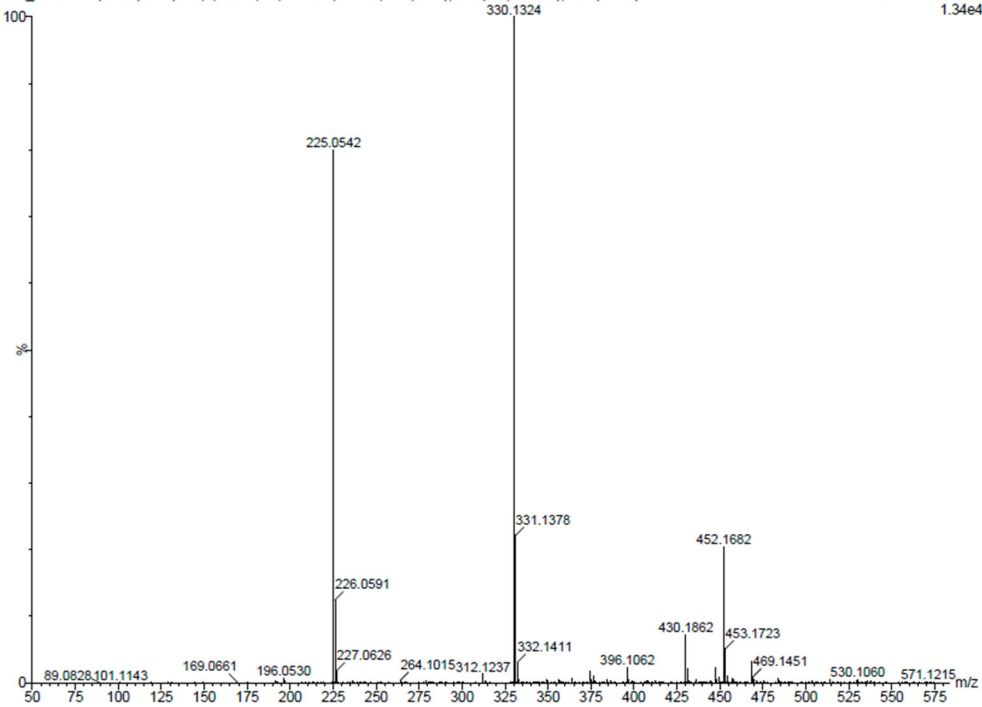

HPLC profile and HR-MS spectrum of **6a**

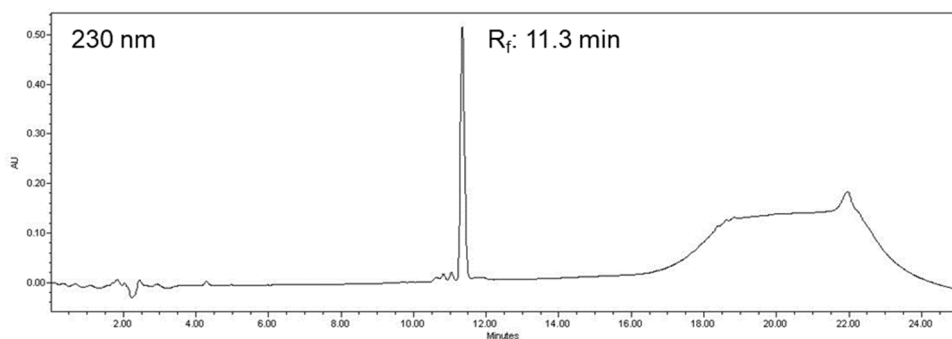

Qtof\_73967 43 (1.627) AM (Cen,5, 80.00, Ar,14000.0,540.35,0.70,LS 5); Sm (SG, 2x3.00); Cm (39:43)

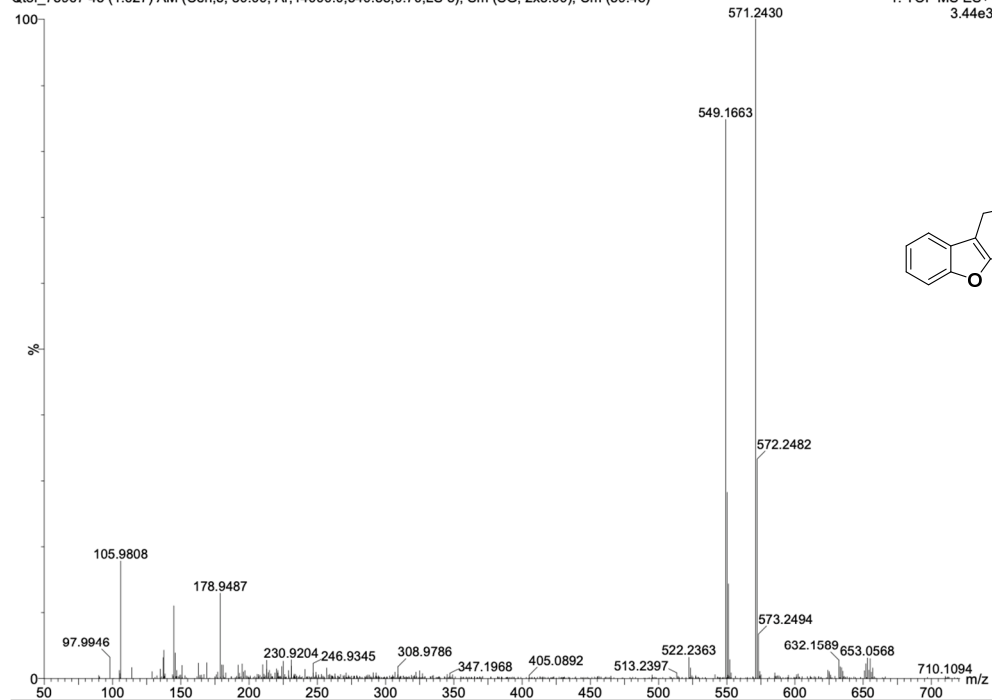

HPLC profile and HR-MS spectrum of **6b**

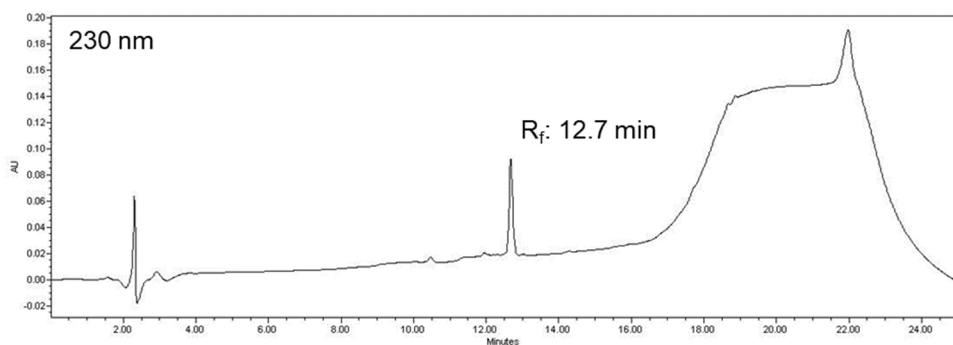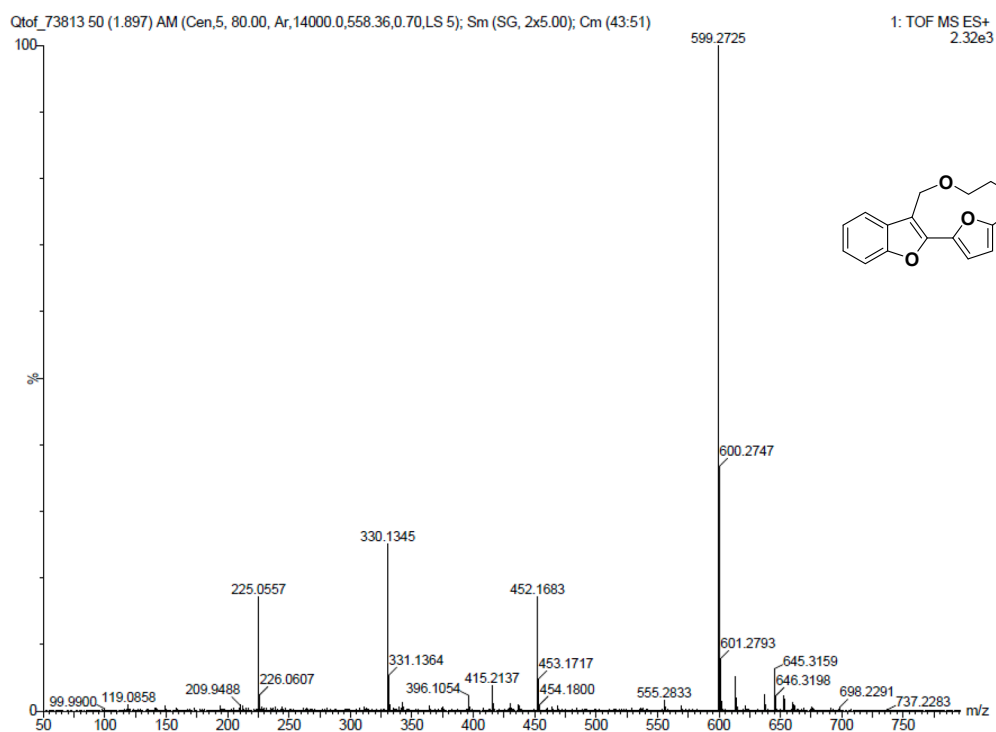

HPLC profile and HR-MS spectrum of **6c**

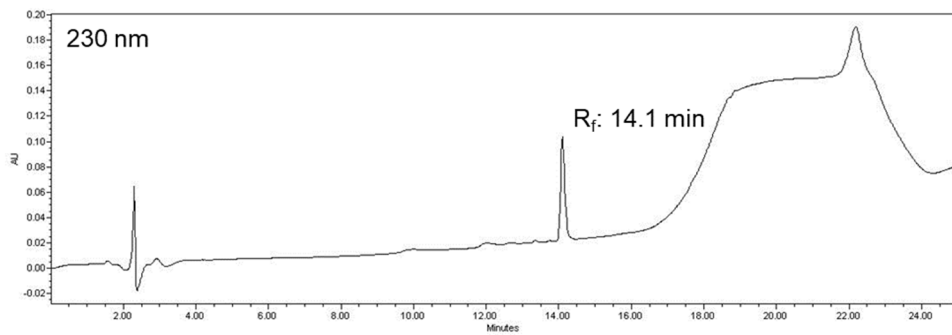

Qtof\_73968a 49 (1.863) AM (Cen,5, 80.00, Ar,14000.0,558.36,0.70,LS 5); Sm (SG, 2x3.00); Cm (44:50)

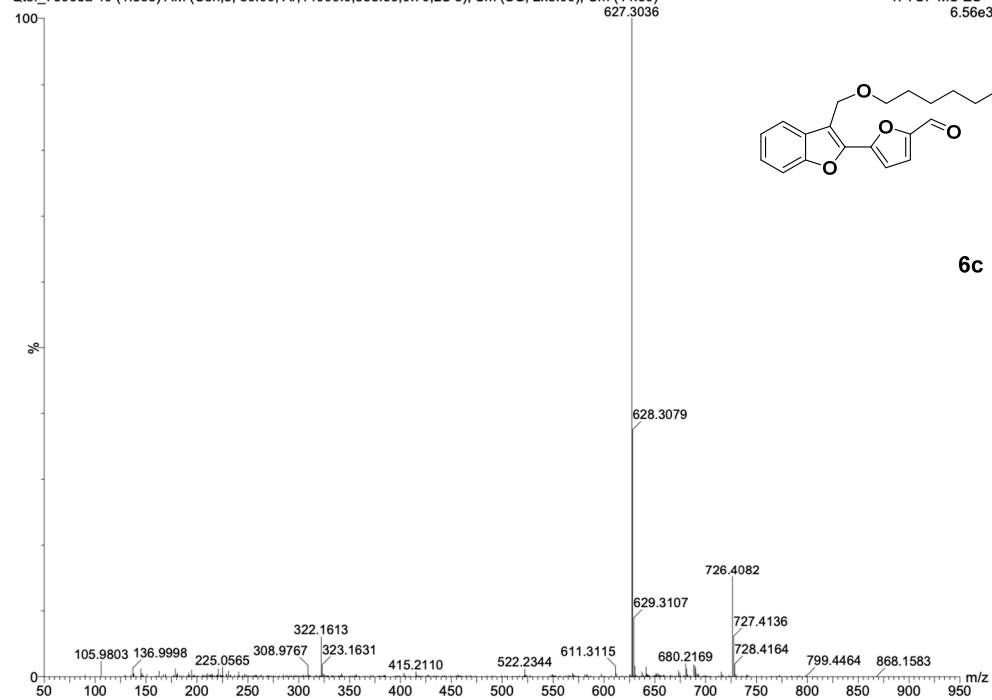

HPLC profile and HR-MS spectrum of **6d**

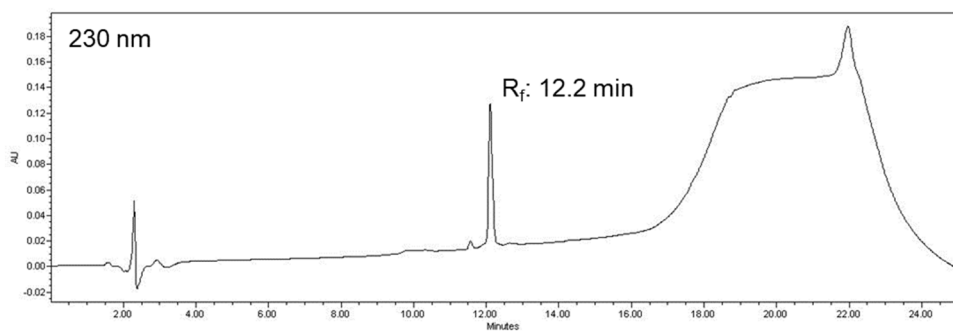

Qtof\_73970\_50 (1.897) AM (Cen,5, 80.00, Ar,14000.0,558.36,0.70,LS 5); Sm (SG, 2x3.00); Cm (47:51) 615.2678

1: TOF MS ES+ 623

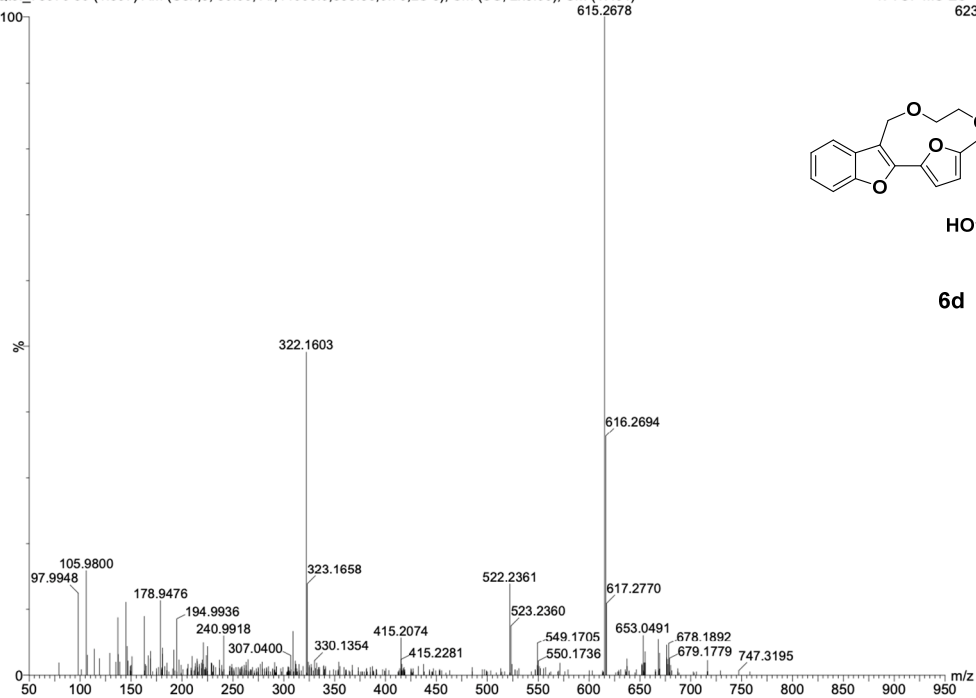



HPLC profiles and HR-MS spectrum of **7a**

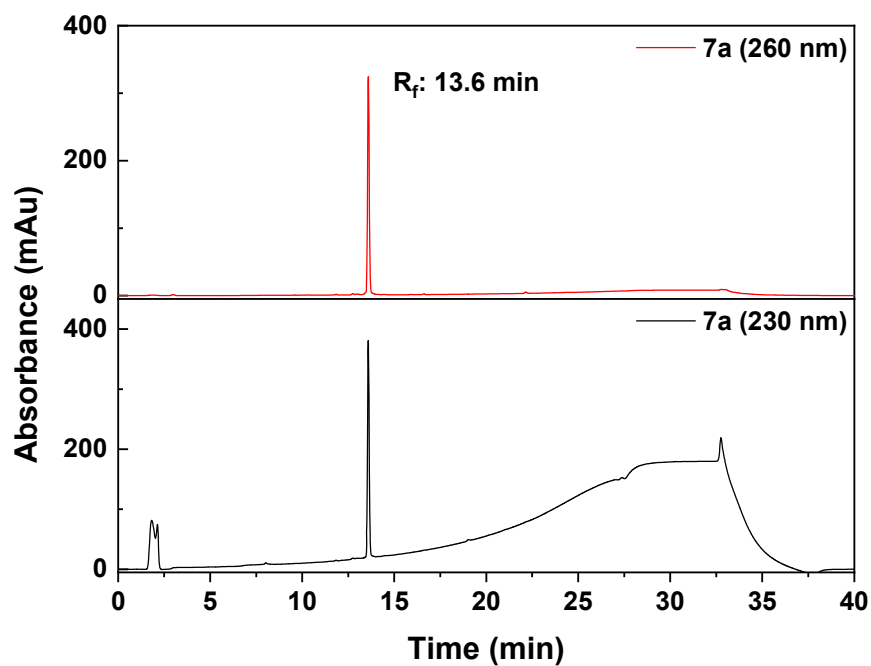

Qtof\_73391 60 (2.538) AM (Cen,5, 80.00, Ar,14000.0,558.36,0.70,LS 5); Sm (SG, 2x5.00); Cm (52:60)

1: TOF MS ES+  
494

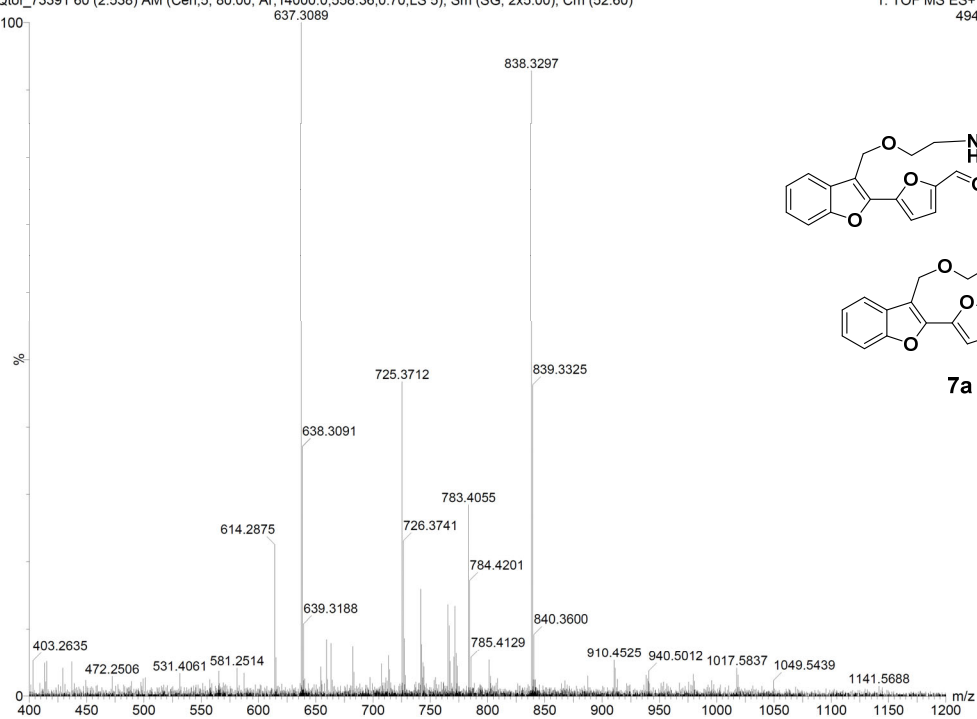

HPLC profiles and HR-MS spectrum of **7b**

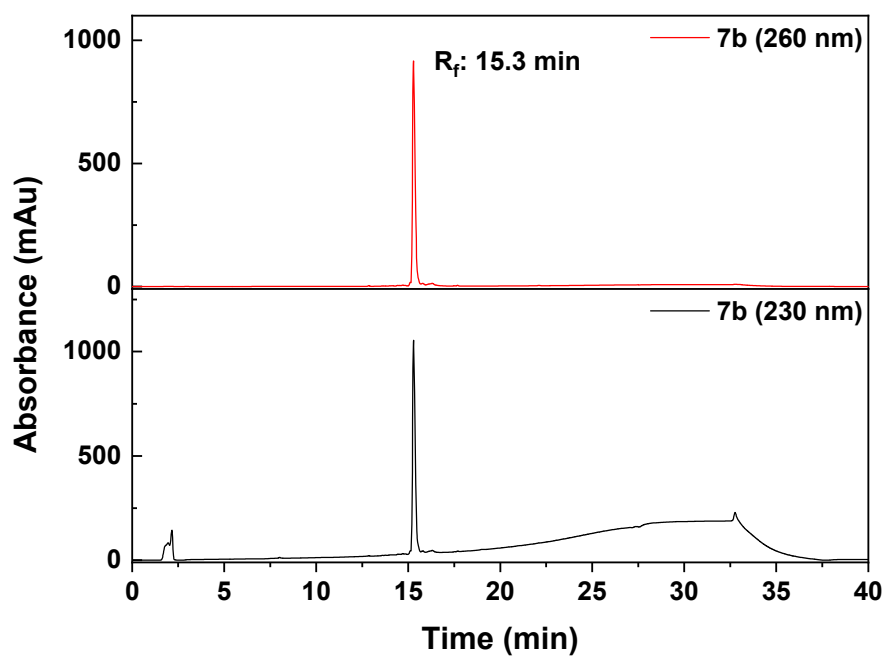

Synapt\_23894a 25 (0.519)

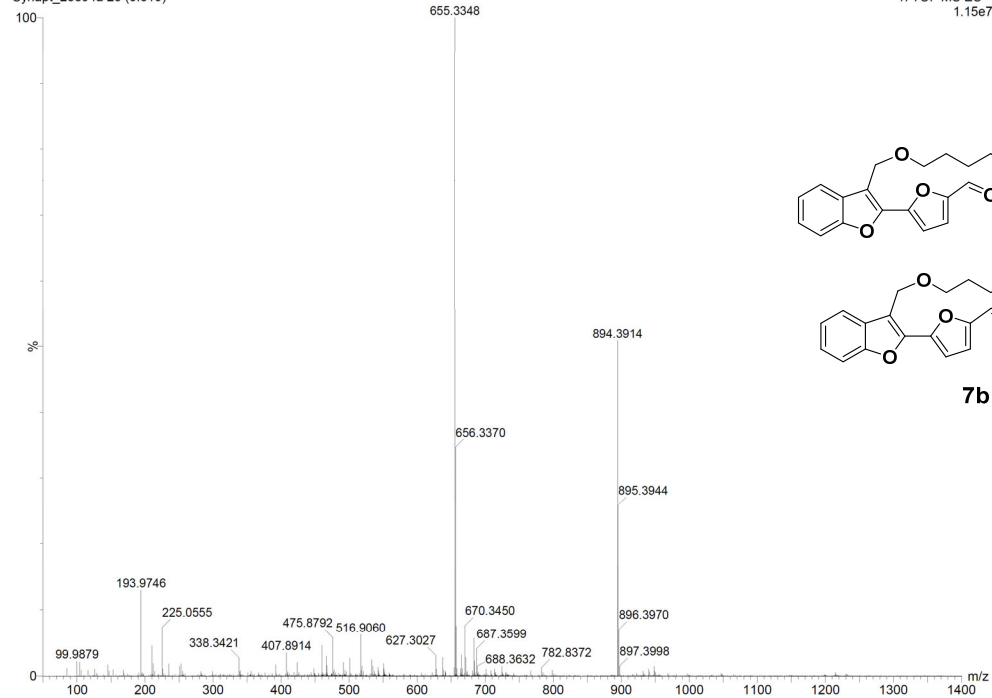

HPLC profiles and HR-MS spectrum of 7c

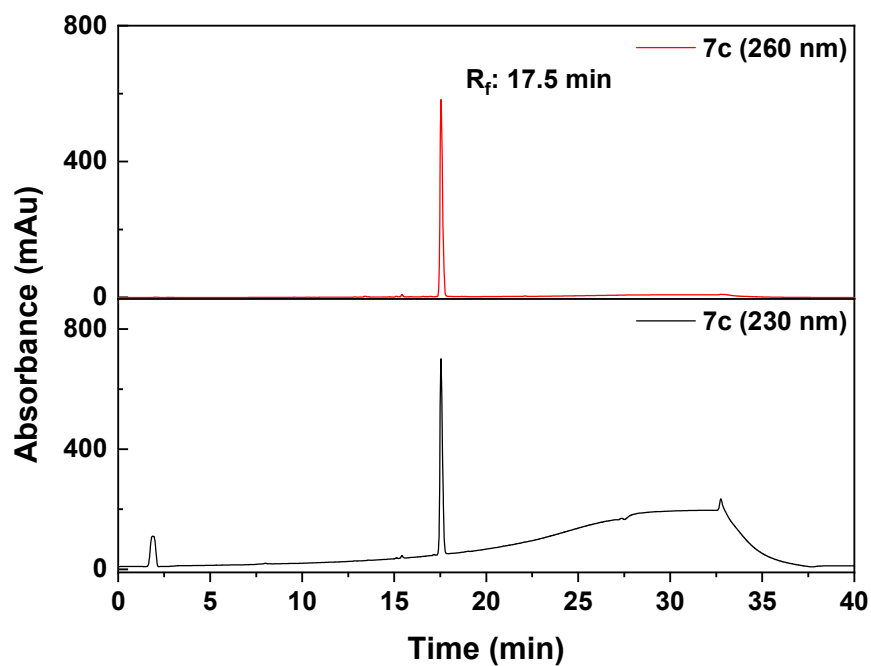

Qtof\_73392 57 (2.437) AM (Cen,5, 80.00, Ar,14000.0,558.36,0.70,LS 5); Sm (SG, 2x5.00); Cm (50:57)

1: TOF MS ES+  
2.54e3

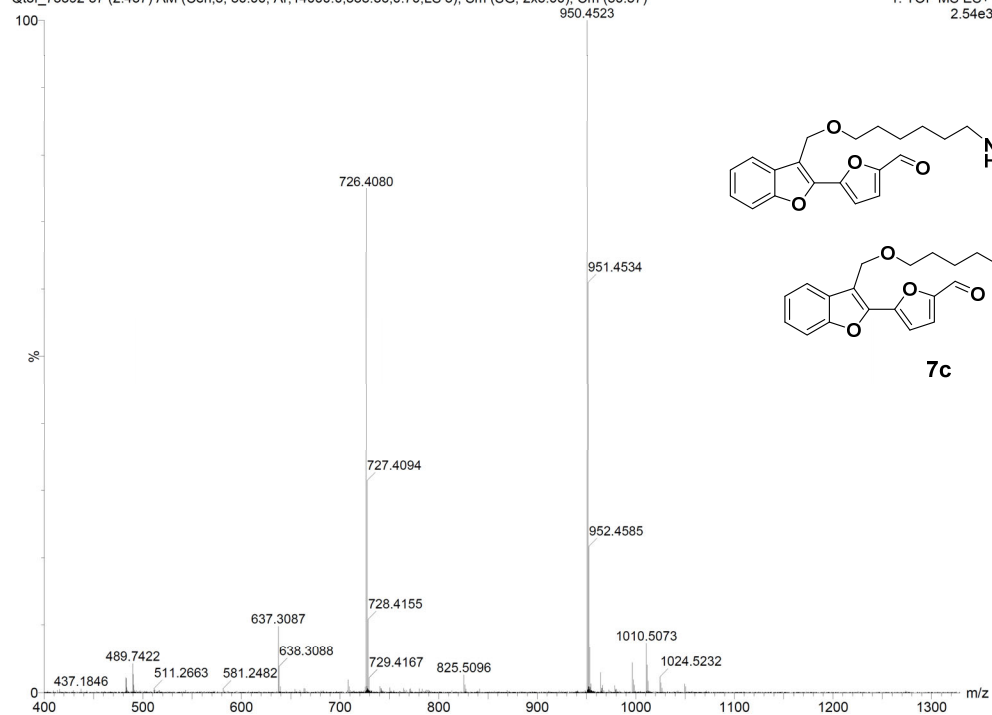

HPLC profiles and HR-MS spectrum of 7d

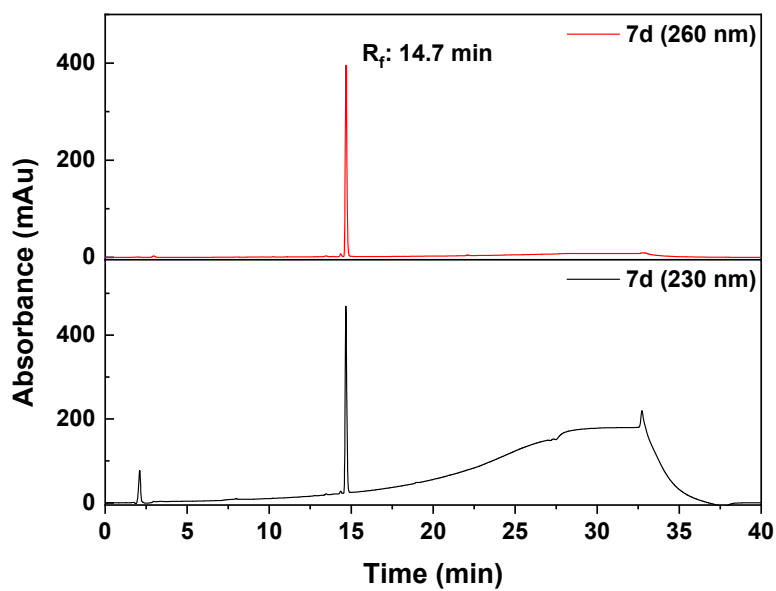

Qtof\_73393 57 (2.437) AM (Cen,5, 80.00, Ar,14000.0,558.36,0.70,LS 5); Sm (SG, 2x5.00); Cm (50:58)

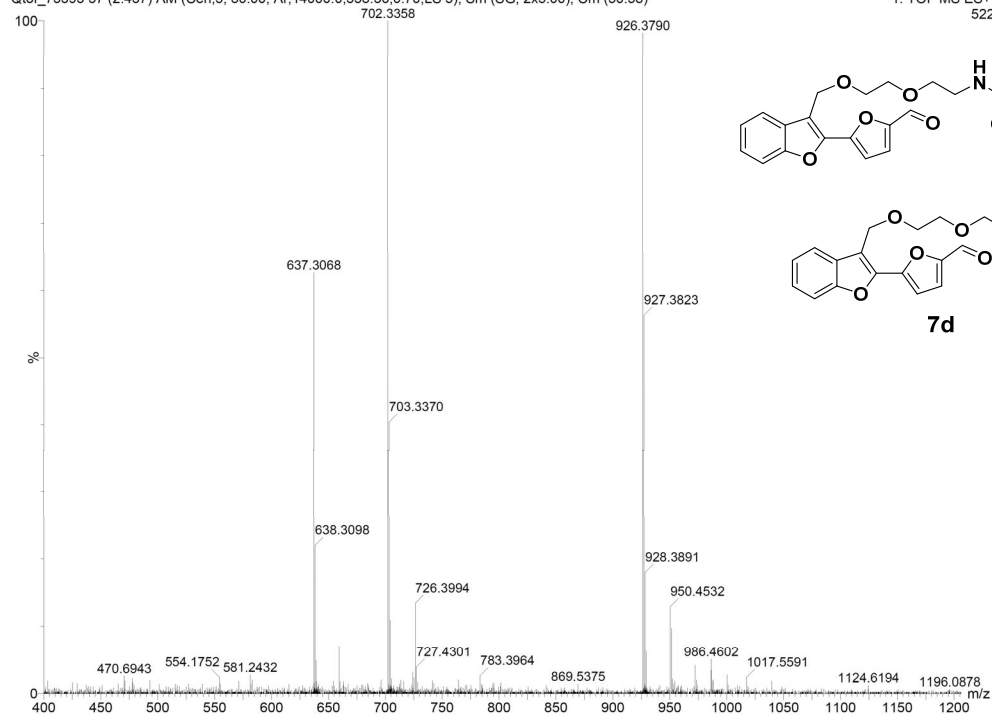

## References

1. H. Erlenmeyer, W. Grubenmann, Über die Synthese von zwei mit Tryptophan isosteren Verbindungen:  $\beta$ -[Cumaronyl-(3)]-alanin und  $\beta$ -[Naphtyl-(1)]-alanin. *Helv. Chim. Acta* **30**, 297-304 (1947).
